# Supplementary material for: Lack of impact of pre-existing T97A HIV-1 integrase mutation on integrase strand transfer inhibitor resistance and treatment outcome
Source: PubMed Central journal article supplement (PMC5315389; doi:10.1371/journal.pone.0172206), 2017-02-17
Supplement: pone.0172206.s001.pdf [file pone.0172206.s001.pdf]

S1 Table. Pre-Treatment Population of Patients with Pre-Existing T97A (n = 47)

| PID #                           | Study #        | Treatment Group  | INSTI Dose | TE/TN | HIV-1 Subtype | Snapshot Outcome | Drug Completion Reason | Adhr Rate (%) <sup>a</sup> | RAP <sup>b</sup> | Visit      | HIV-1 RNA | CD4  | Integrase Sequence <sup>c, d</sup>                                                                                                                     | INSTI RAM(s) <sup>d</sup>  | T97A Status      | IN Phenotypic Data <sup>e</sup> |        |        |        | RTI RAM(s) <sup>f</sup>          | PI RAM(s) <sup>g</sup>            |
|---------------------------------|----------------|------------------|------------|-------|---------------|------------------|------------------------|----------------------------|------------------|------------|-----------|------|--------------------------------------------------------------------------------------------------------------------------------------------------------|----------------------------|------------------|---------------------------------|--------|--------|--------|----------------------------------|-----------------------------------|
|                                 |                |                  |            |       |               |                  |                        |                            |                  |            |           |      |                                                                                                                                                        |                            |                  | RC                              | EVG FC | RAL FC | DTG FC |                                  |                                   |
| Enrolled on INSTI-based Regimen |                |                  |            |       |               |                  |                        |                            |                  |            |           |      |                                                                                                                                                        |                            |                  |                                 |        |        |        |                                  |                                   |
| 1                               | GS-US-183-0145 | EVG/r++TDF+DRV   | 150 mg     | TE    | B             | VS (W96)         | ND                     | 86                         | -                | SCR        | 13900     | 434  | S24S/G S39C L45V M50I I84L P90P/S T97T/A V113I T124T/A V201I V234L                                                                                     | T97T/A M50I                |                  | ND                              | 1.18   | 0.82   | 0.94   |                                  | I13V L63P                         |
| 2                               | GS-US-236-0102 | EVG/COBI/FTC/TDF | 150 mg     | TN    | B             | VS (W144)        | ND                     | 91                         | -                | BL         | 103000    | 1311 | V31I T97A K111T T124A T206S V234L                                                                                                                      | T97A                       |                  | ND                              | 2.75   | 1.58   | ND     |                                  | M36I L63P A71V V77I I93L          |
| 3                               | GS-US-236-0102 | EVG/COBI/FTC/TDF | 150 mg     | TN    | B             | VS (W144)        | ND                     | 98                         | -                | BL         | 22900     | 396  | D6E K14R S17N S39C M50I K71Q V72I S81S/R T97T/A L101I V113I S119R T125A V201I V234L I268L                                                              | T97T/A M50I V72I S119R     |                  | ND                              | 1.97   | 1.65   | ND     |                                  | L10V I13V L63P                    |
| 4                               | GS-US-236-0102 | EVG/COBI/FTC/TDF | 150 mg     | TN    | B             | VS (W144)        | ND                     | 99                         | -                | BL         | 13900     | 344  | S17N V31I Q53H V72I P90P/S T97T/A L101L/I L104L/I T124N T125A G163A V201I K211Q I220V V234L V260I                                                      | T97T/A V72I G163A          |                  | ND                              | 1.87   | 1.34   | ND     |                                  |                                   |
| 5                               | GS-US-236-0103 | EVG/COBI/FTC/TDF | 150 mg     | TN    | B             | VS (W144)        | ND                     | 100                        | -                | SCR        | 109000    | 301  | E11D V31I S39N V72I A91E T97T/A Y99V/F L101I K111N V113I S119R T124N T125T/A I135V V201I K219N N222K S230N D232E V234L                                 | T97T/A V72I S119R          |                  | ND                              | 2.15   | 1.30   | 0.87   | K103K/N                          | L63P/Q I64I/V                     |
| 6                               | GS-US-236-0103 | EVG/COBI/FTC/TDF | 150 mg     | TN    | B             | VS (W144)        | ND                     | 100                        | -                | SCR        | 16200     | 466  | K7K/R S39C M50I V72I T97A V113I S119S/R T124A T125A K211Q D232D/E V234L                                                                                | T97A M50I V72I S119S/R     |                  | ND                              | 7.53   | 2.25   | 0.84   |                                  | M36I I62V L63P V77I I93L          |
| 7                               | GS-US-236-0128 | EVG/COBI/FTC/TDF | 150 mg     | TN    | D             | VS (W48)         | ND                     | 94                         | -                | SCR        | 7910      | 507  | S17N L28I L45L/I V79W/I T97A T112V V113V/I S119R T125A D167E K173R V201I I208I/M V234I K240K/R D256E A265V D286N                                       | T97A S119R                 |                  | 73                              | 2.85   | 1.18   | 0.67   |                                  | I13V M36I I64V                    |
| 8                               | GS-US-236-0128 | EVG/COBI/FTC/TDF | 150 mg     | TN    | A             | VS (W48)         | ND                     | 98                         | -                | SCR        | 119000    | 637  | E11E/K V31I D41D/N I60M T97A T112V T124A T125A V126F G134N I135V K136Q F139Y D167E V201I T218T/I I220L/Q Q221Q/H V234I/L A265A/V R269R/K D278D/A S283G | T97A                       |                  | 44                              | 3.32   | 2.24   | 0.45   |                                  | I13V M36I H69K                    |
| 9                               | GS-US-236-0128 | EVG/COBI/FTC/TDF | 150 mg     | TN    | A1            | VS (W48)         | ND                     | 99                         | -                | BL         | 4950      | 287  | S17N D25E V31I S39S/N L63I L74I I84L T97A S119T T124A T125A V126F G134N K136Q P142P/S D167E V201I T218L V234I S255N                                    | T97A L74I S119T            |                  | 84                              | 2.97   | 2.22   | 0.49   |                                  | L10V I13I/V G16E M36I/V I62V H69K |
| 10                              | GS-US-236-0128 | EVG/COBI/FTC/TDF | 150 mg     | TN    | A             | VS (W48)         | ND                     | 100                        | -                | BL         | 366       | 699  | K14R A21T V31I T97A T112V T124A T125A V126F G134N I135V K136Q D167E K173R V201I V234I S283G                                                            | T97A                       |                  | 207                             | 4.20   | 1.55   | 0.56   | V118I                            | I13V M36I I62V H69K               |
| 11                              | GS-US-236-0128 | EVG/COBI/FTC/TDF | 150 mg     | TN    | D             | VS (W48)         | ND                     | 95                         | -                | BL         | 143000    | 577  | S17N L28I S39C M50L V72I T97T/A L101I T112M V113I S119S/G/R T122T/I T124A T125A V201I T218I V234I S283G                                                | T97T/A M50L V72I S119S/G/R |                  | ND                              | 2.76   | 1.52   | 1.25   | K101E G190A                      | I13V M36I D60E I64V               |
| 12                              | GS-US-236-0128 | EVG/COBI/FTC/TDF | 150 mg     | TN    | A1            | VS (W48)         | ND                     | 100                        | -                | SCR        | 45600     | 290  | S17N I60M T97A L101I V110V/I T124A T125A V126F G134N D167E G193D V201I T210T/I K211R T218I V234I R269K D270H S283G                                     | T97A                       |                  | 1                               | 2.22   | 1.33   | 0.58   |                                  | I13V M36I H69K                    |
| 13                              | GS-US-236-0128 | EVG/COBI/FTC/TDF | 150 mg     | TN    | A1            | VS (W48)         | ND                     | 100                        | -                | SCR        | 11000     | 590  | K14R S24G V32I S39N L45Q L74I T97A T112I V113A T124A T125A V126F G134D I135V D167E V201I K211R N222K V234I S283G                                       | T97A L74I                  |                  | 20                              | 2.33   | 0.99   | 0.54   | K103N E138G V179T                | I13V M36I/L H69K                  |
| 14                              | GS-US-236-0128 | EVG/COBI/FTC/TDF | 150 mg     | TN    | A1            | VS (W48)         | ND                     | 94                         | -                | SCR        | 22100     | 497  | A21A/S V32I D41D/N I60M T97A T112V T124A T125A V126F G134S K136Q D167E V201I T218T/I V234I D256D/E S283G                                               | T97A                       |                  | 39                              | 1.94   | 1.23   | 0.57   |                                  | L10V I13V K20R M36I H69K          |
| 15                              | GS-US-236-0128 | EVG/COBI/FTC/TDF | 150 mg     | TN    | G             | VS (W48)         | ND                     | 96                         | -                | BL         | 29500     | 244  | K14R S17N/T V31I V72I T97T/A L101I T112I V113I H114H/Y T124A T125A G134N K136T V201I T206S V234I S255N D256E S283G                                     | T97T/A V72I                |                  | 68                              | 1.33   | 1.21   | 1.04   |                                  | I13V K20I M36I L63L/P H69K V82I   |
| 16                              | GS-US-292-0111 | EVG/COBI/FTC/TDF | 150 mg     | TN    | B             | VS (W96)         | ND                     | 47%                        | -                | SCR        | 9290      | 422  | E10D K14K/R V31I K71Q V72I I84M T97T/A L101I V113I S119R K188K/R V234I/L                                                                               | T97T/A V72I S119R          |                  | 41                              | 4.19   | 1.49   | 0.77   |                                  | M36I L63P A71A/T                  |
| 17                              | GS-US-183-0145 | EVG/r++TDF+DRV   | 150 mg     | TE    | B             | VF (W96)         | Withdrawn Consent      | 47%                        | -                | SCR        | 8880      | 27   | S17N S39C T97A L101I V113I S119T T124G T125A K156N V201I V234L                                                                                         | T97A S119T                 |                  | ND                              | 2.61   | 0.64   | ND     | T69D/N M184M/V K219R K101E G190S | G16E M36I I62V L63P               |
|                                 | GS-US-183-0145 | EVG/r++TDF+DRV   | 150 mg     | TE    | B             | VF (W96)         | Withdrawn Consent      | 47%                        | -                | ESDD (W8)  | 8970      | 27   | ND                                                                                                                                                     | ND                         |                  | ND                              | ND     | ND     | ND     | ND                               | ND                                |
| 18                              | GS-US-183-0145 | EVG/r++TDF+DRV   | 150 mg     | TE    | G             | VF (W96)         | Subject Non-Compliance | 84%                        | W48              | BL         | 66100     | 340  | K14R R20K V31I V32V/A A33A/T V72I T97A L101I T112I/V V113I T124A T125A G134N I135V G163Q G193E V201I T206S T218T/I Y227F V234I S255N D256E D279G S283G | T97A V72I G163Q            |                  | ND                              | 1.84   | 1.14   | ND     | V90I                             | I13V K20I M36I H69K V82I          |
|                                 | GS-US-183-0145 | EVG/r++TDF+DRV   | 150 mg     | TE    | G             | VF (W96)         | Subject Non-Compliance | 84%                        | W48              | W40        | 38900     | ND   | K14R R20K V31I V72I T97A L101I T112I/V V113I T124A T125A G134N I135V G163Q G193E V201I T206S T218T/I Y227F/V V234I S255N D256E D279G S283G             | T97A V72I G163Q            | Maintained       | ND                              | 2.19   | 1.3    | ND     | V90I                             | I13V K20I M36I H69K V82I          |
|                                 | GS-US-183-0145 | EVG/r++TDF+DRV   | 150 mg     | TE    | G             | VF (W96)         | Subject Non-Compliance | 84%                        | W48              | ESDD (W48) | 330       | 497  | ND                                                                                                                                                     | ND                         | Not tested again | ND                              | ND     | ND     | ND     | ND                               | ND                                |

| PID #                                               | Study #        | Treatment Group | INSTI Dose | TE/ TN | HIV-1 Subtype | Snapshot Outcome | Drug Completion Reason | Adhr Rate (%) <sup>a</sup> | RAP <sup>b</sup> | Visit | HIV-1 RNA | CD4 | Integrase Sequence <sup>c, d</sup>                                                                                                                                    | INSTI RAM(s) <sup>d</sup> | T97A Status | IN Phenotypic Data <sup>e</sup> |        |        |        | RTI RAM(s) <sup>f</sup> | PI RAM(s) <sup>g</sup>                            |
|-----------------------------------------------------|----------------|-----------------|------------|--------|---------------|------------------|------------------------|----------------------------|------------------|-------|-----------|-----|-----------------------------------------------------------------------------------------------------------------------------------------------------------------------|---------------------------|-------------|---------------------------------|--------|--------|--------|-------------------------|---------------------------------------------------|
|                                                     |                |                 |            |        |               |                  |                        |                            |                  |       |           |     |                                                                                                                                                                       |                           |             | RC                              | EVG FC | RAL FC | DTG FC |                         |                                                   |
| Not Enrolled or Not Enrolled on INSTI-based Regimen |                |                 |            |        |               |                  |                        |                            |                  |       |           |     |                                                                                                                                                                       |                           |             |                                 |        |        |        |                         |                                                   |
| 19                                                  | GS-US-99-903   | d4T+3TC+EFV     | -          | TN     | A             | ND               | ND                     | ND                         | -                | BL    | 5094      | 624 | K7K/R V72I L74L/I T97T/A L101I T112V V113I T124A T125A G134N K136Q V201I R231R/K V234I S283G                                                                          | T97T/A V72I L74L/I        |             | ND                              | 1.68   | 1.08   | 0.72   |                         | I13V K20I M36I H69K                               |
| 20                                                  | GS-US-236-0102 | EFV/FTC/TDF     | -          | TN     | B             | VF (W144)        | Lost To Follow-Up      | 100%                       | W96              | BL    | 11900     | 512 | E11D V31I M50M/T G70E V72I T97A L101I T112I V113I S119R T124N D167E V201I T206S I208L E212A T218S V234L K240K/R S255N D256E R284G                                     | T97A M50M/T V72I S119R    |             | 177                             | 6.08   | 2.59   | ND     |                         | M36I                                              |
| 21                                                  | GS-US-236-0103 | ATV/r+FTC/TDF   | -          | TN     | B             | ND (W144)        | Lost To Follow-Up      | 96%                        | W48              | BL    | 238000    | 208 | S24G S39C V79A T97T/A L101I V113I T124N V201I O216R K219Q V234L A265V S283G                                                                                           | T97T/A                    |             | ND                              | 1.00   | 0.80   | ND     | V118I                   | K20R I62V L63P V77I I93L                          |
| 22                                                  | GS-US-236-0128 | ATV/r+FTC/TDF   | -          | TN     | A1            | VF (W48)         | Lack Of Efficacy       | 99%                        | W48              | BL    | 52200     | 345 | R20K V31I L74I V77V/A T97T/A L101L/I T112V V113I S119P T124S T125A G134N K136Q D167E V201I T206I/S D207D/E I208I/L T210T/I T218I V234I S255N                          | T97T/A L74I S119P         |             | AF                              | AF     | AF     | AF     | K103N                   | I13V M36I H69K I93I/L                             |
| 23                                                  | GS-US-292-0104 | -               | -          | TN     | B             | -                | -                      | -                          | -                | SCR   | 22400     | ND  | E11D R20R/K V31I G70E V72I V75V/M T97A L101I T112V V113I S119R T124N/S T125T/A I135V F181F/L V201I T206S V234L V281M                                                  | T97A V72I S119R           |             | 124                             | 10.70  | 4.04   | 0.66   |                         | M36M/I I62V L63P/S I64I/L/V                       |
| 24                                                  | GS-US-292-0104 | -               | -          | TN     | B             | -                | -                      | -                          | -                | SCR   | 24900     | ND  | E11D V72I A91E T97A L101I K111Q V113I S119R V201I V234L S283G                                                                                                         | T97A V72I S119R           |             | 134                             | 6.78   | 3.04   | 0.79   | V90V/I                  | L63P A71V V77V/I I93L                             |
| 25                                                  | GS-US-292-0104 | -               | -          | TN     | B             | -                | -                      | -                          | -                | SCR   | 14700     | ND  | V31I M50I G70E T97A L101I V113I S119R T124A T125A I135V F181F/L V201I V234L D256E                                                                                     | T97A M50I S119R           |             | 163                             | 6.21   | 2.37   | 0.68   |                         | G16E D60E I62V I64V V77I                          |
| 26                                                  | GS-US-292-0104 | -               | -          | TN     | AG            | -                | -                      | -                          | -                | SCR   | 4790      | ND  | E11D S24N V31I V72I T97T/A L101I T112V V113I S119T T124A T125A G134N I135V K136T E157Q K160Q V201I I203M T206S I208L T218I V234I A265V S283G R284G D288N              | T97T/A V72I S119T E157Q   |             | 107                             | 2.62   | 1.58   | 0.94   |                         | I13V K20I M36I H69K                               |
| 27                                                  | GS-US-292-0104 | -               | -          | TN     | B             | -                | -                      | -                          | -                | SCR   | 30500     | ND  | E11D S17T A23V V72V/I T97A L101I K111A/T V113I T124A V234L                                                                                                            | T97A V72V/I               |             | 112                             | 2.20   | 1.41   | 0.65   |                         | I62I/V V77V/I                                     |
| 28                                                  | GS-US-292-0104 | -               | -          | TN     | B             | -                | -                      | -                          | -                | SCR   | 6920      | ND  | S17N V31I T97A L101I T112I V113I T124A K136Q V234L D253E D256E                                                                                                        | T97A                      |             | 144                             | 1.92   | 1.41   | 0.97   | K103N Y181C H221Y       | M46L Q58E V82A L10I K20R M36I I54V I62V I64V A71T |
| 29                                                  | GS-US-292-0104 | -               | -          | TN     | B             | -                | -                      | -                          | -                | SCR   | 26500     | ND  | S17N V31I T97A L101I V113I T124A Q177V K211R V227F V234L K264R A265V D288N                                                                                            | T97A                      |             | 44                              | 1.64   | 1.30   | 0.52   |                         | L63P V77I I93L                                    |
| 30                                                  | GS-US-292-0104 | -               | -          | TN     | B             | -                | -                      | -                          | -                | SCR   | 3330      | ND  | E10A S17N/T V31I V72I T97A L101I R107R/G T112T/I V113I T124A D167E G193E V234L D256E D278A S283G                                                                      | T97A V72I                 |             | 5                               | 1.57   | 1.20   | 0.64   | V90V/I                  | M36I I64V                                         |
| 31                                                  | GS-US-292-0104 | -               | -          | TN     | AG            | -                | -                      | -                          | -                | SCR   | 6850      | ND  | E11D K14R R20R/K S24N V31I I60I/T G70G/E V72I E96E/D T97T/A L101I K103R T112V V113I T124A T125A G134N I135I/V K136T D167D/E V201I T206S V234I V259I R269K S283G D286N | T97T/A V72I               |             | 59                              | 1.39   | 1.06   | 0.61   |                         | I13V K20I E35G M36V I64I/M H69K V77I              |
| 32                                                  | GS-US-292-0104 | -               | -          | TN     | B             | -                | -                      | -                          | -                | SCR   | 107000    | ND  | V32I M50I I84M E96E/D T97T/A L101I L104L/I V113I T124A G193E V201I T206S T218A/S N222H V234L D253E S255N D256E D279G                                                  | T97T/A M50I               |             | 97                              | 1.14   | 0.90   | 0.9    | T69N                    | I62V L63P I93L                                    |
| 33                                                  | GS-US-292-0104 | -               | -          | TN     | A1            | -                | -                      | -                          | -                | SCR   | 15200     | ND  | K14R V31I L45Q L74M T97A L101V T112V V113I T124A T125A V126F G134N I135V K136Q D167E K173R V201I T210T/I T218T/S V234I D279G S283G                                    | T97A L74M                 |             | AF                              | AF     | AF     | AF     |                         | I13V M36I I62I/V H69K                             |
| 34                                                  | GS-US-292-0104 | -               | -          | TN     | B             | -                | -                      | -                          | -                | SCR   | 3550      | ND  | E11D S17N A21S A23V V72I T97A L101I K103K/R T112T/I V113I S119P T122I T125A V234L A265A/V                                                                             | T97A V72I S119P           |             | ND                              | 4.3    | 1.39   | 0.71   |                         | M36I L63P A71T                                    |
| 35                                                  | GS-US-292-0104 | -               | -          | TN     | AE            | -                | -                      | -                          | -                | SCR   | 30100     | ND  | K14R A21T V31I L74M H78R T97A T112I V113I T124A T125A G134N I135V K136R D167E V201I I203M T206S V234I S283G                                                           | T97A L74M                 |             | AF                              | AF     | AF     | AF     |                         | I13V M36I H69K                                    |
| 36                                                  | GS-US-292-0106 | -               | -          | TN     | Complex       | -                | -                      | -                          | -                | SCR   | 25000     | ND  | K14K/R S17N A23A/V S24S/G V31V/I V32V/I S39C M50I T93T/K/N T97T/A L101I T112V T124A T125A K136Q D167E V201I A205A/S T206S E212E/A V234L D286D/N                       | T97T/A M50I               |             | ND                              | ND     | ND     | ND     | E138A                   | G16E K20K/T V77V/I                                |
| 37                                                  | GS-US-292-0106 | -               | -          | TN     | D             | -                | -                      | -                          | -                | SCR   | 131000    | ND  | S17N M50L T97T/A L101L/I T112V S119P/T T124A T125A V201I T206S I208I/L T210T/I O214O/E T218I V234L D256E S283G                                                        | T97T/A M50L S119P/T       |             | ND                              | ND     | ND     | ND     |                         | I13I/V M36I I62V I64V                             |
| 38                                                  | GS-US-292-0106 | -               | -          | TN     | D             | -                | -                      | -                          | -                | SCR   | 63700     | ND  | S17N M50L K71Q V72I T97A L101I T112V S119R T122T/A T125A V201I D256E A265V R269R/K                                                                                    | T97A M50L V72I S119R      |             | ND                              | ND     | ND     | ND     |                         | I13V L33V I64V                                    |
| 39                                                  | GS-US-292-0106 | -               | -          | TN     | A1            | -                | -                      | -                          | -                | SCR   | 44000     | ND  | K14R A21T V31I I60I/M I84L T97A T124A T125A V126F G134N I135I/V K136Q D167E K188K/R G193G/E V201I I208M V234I S255S/N A265V R269R/K D278D/A D286N                     | T97A                      |             | ND                              | ND     | ND     | ND     |                         | I13V M36I H69K                                    |

| PID # | Study #        | Treatment Group | INSTI Dose | TE/ TN | HIV-1 Subtype | Snapshot Outcome | Drug Completion Reason | Adhr Rate (%) <sup>a</sup> | RAP <sup>b</sup> | Visit | HIV-1 RNA | CD4 | Integrase Sequence <sup>c, d</sup>                                                                                                                   | INSTI RAM(s) <sup>d</sup> | T97A Status | IN Phenotypic Data <sup>e</sup> |        |        |        | RTI RAM(s) <sup>f</sup> | PI RAM(s) <sup>g</sup>                                        |
|-------|----------------|-----------------|------------|--------|---------------|------------------|------------------------|----------------------------|------------------|-------|-----------|-----|------------------------------------------------------------------------------------------------------------------------------------------------------|---------------------------|-------------|---------------------------------|--------|--------|--------|-------------------------|---------------------------------------------------------------|
|       |                |                 |            |        |               |                  |                        |                            |                  |       |           |     |                                                                                                                                                      |                           |             | RC                              | EVG FC | RAL FC | DTG FC |                         |                                                               |
| 40    | GS-US-292-0111 | -               | -          | TN     | B             | -                |                        |                            | -                | SCR   | 51200     | ND  | E11D S17T A23V V37I V72I T97A L101I V113I T124A T125A I135V V201I V234L D256E                                                                        | T97A V72I                 |             | 79                              | 2.38   | 1.27   | 0.73   |                         | L10V I64L                                                     |
| 41    | GS-US-292-0111 | -               | -          | TN     | B             | -                |                        |                            | -                | SCR   | 4770      | ND  | E11D A21T A23V K34K/R L45V M50I V72I T93S T97T/A L101L/I V113I T124A V165I S195T V201I Q216H V234L S255R                                             | T97T/A M50I V72I          |             | 84                              | 1.76   | 1.30   | 1.04   | E138A                   | L63L/P I64V V77I                                              |
| 42    | GS-US-292-0111 | -               | -          | TN     | B             | -                |                        |                            | -                | SCR   | 4650      | ND  | S17S/N V31I V72I T97T/A L101L/I V113I T124A I182V K219N N222K V234L D256E                                                                            | T97T/A V72I               |             | 122                             | 1.51   | 1.08   | 0.94   |                         | D60E L63P A71T V77I                                           |
| 43    | GS-US-292-0111 | -               | -          | TN     | B             | -                |                        |                            | -                | SCR   | 176000    | ND  | V31I L45V V72I T97T/A L101I T112V V113I T124Q T125A I135V V201I V234L                                                                                | T97T/A V72I               |             | 110                             | 1.25   | 1.08   | 0.95   | M41L                    | L33F M46L L76V L10I I13V L24I M36L I54V I62I/V L63P V82I I85V |
| 44    | GS-US-292-0111 | -               | -          | TN     | B             | -                |                        |                            | -                | SCR   | 35900     | ND  | S17N T97T/A L101I T124A T125A I161I/T G163E/K T206S V234L V281M                                                                                      | T97T/A G163E/K            |             | 44                              | 1.10   | 0.98   | 0.87   | V118I K103N E138G Y188L | L63P                                                          |
| 45    | GS-US-292-0111 | -               | -          | TN     | A1            | -                |                        |                            | -                | SCR   | 12900     | ND  | K14R S24N V31I I60M T97T/A K103K/R T112V T124A T125A V126F G134N K136Q F139Y D167E Q177L V201I I203M K211R K219N N222K V234I S255N A265V S283G D286N | T97T/A                    |             | AF                              | AF     | AF     | AF     | V179I/T                 | I13V G16E M36I H69K                                           |
| 46    | GS-US-292-0111 | -               | -          | TN     | B             | -                |                        |                            | -                | SCR   | 10200     | ND  | D25E V31I V72I O95Q/P E96E/D T97T/A L101I K111R V113I D167E V201I T206S I220L V234L R262K I268L                                                      | T97T/A V72I               |             | AF                              | AF     | AF     | AF     |                         | V77I                                                          |
| 47    | GS-US-292-0111 | -               | -          | TN     | A1            | -                |                        |                            | -                | SCR   | 83400     | ND  | S17N M50I K71Q L74I T97A T112V V113I S119R T124A T125A K136Q D167E K173K/R V201I T218S Y227F V234V/I S283G                                           | T97A M50I L74I S119R      |             | ND                              | 4.15   | 1.81   | 0.84   |                         | I13V M36I H69K                                                |

<sup>a</sup> Overall adherence rate as determined by pill count in returned pill bottles.

<sup>b</sup> The resistance analysis population (RAP) included subjects with either 1) virologic rebound (VR): HIV-1 RNA  $\geq 50$  copies/mL at any visit, that is confirmed and  $\geq 400$  copies/mL at the next scheduled or unscheduled visit; or 2) Discontinuation from study with HIV-1 RNA  $\geq 400$  copies/mL at last visit (Last) while receiving study drugs (or within 72 hours of discontinuation). Subjects who were not receiving study drugs within 72 hours prior to virologic rebound (Off SD) were not analyzed for resistance.

<sup>c</sup> Monogram Biosciences (South San Francisco, CA) GeneSeq™ Integrase or GenoSure™ Integrase assay

<sup>d</sup> Post-baseline IN sequence was compared to Baseline (BL) or Screening (SCR) IN sequence with emergent RAMs shown in bold. Primary INSTI RAMs are: T66A/I/K, E92G/Q, T97A, Y143C/H/R, S147G, Q148H/K/R, and N155H. Secondary INSTI RAMs are: M50I, H51Y, L68I/V, V72A/N/T, L74I/M, Q95K/R, G118R, S119G/P/R/T, F121C/Y, A128T, E138A/K, G140A/C/S, P145S, Q146I/K/L/P/R, V151A/L, S153A/F/Y, E157K/Q, G163K/R, E170A, and R263K. Other variants at IN positions associated with INSTI RAMs are also indicated.

<sup>e</sup> Monogram Biosciences (South San Francisco, CA) PhenoSense™ Integrase assay. Replication capacity (RC) expressed as % of wild-type control. Drug susceptibility data expressed as EC<sub>50</sub> fold change (FC) from wild-type control.

<sup>f</sup> NRTI mutations are: M41L, E44D, A62V, K65R, D67N, T69D/N, T69 insertion, K70E/R, L74I/V, V75I, F77L, Y115F, F116Y, V118I, Q151M, M184I/V, L210W, T215F/Y, and K219E/N/O/R in RT. NNRTI-R mutations are: V90I, A98G, L100H/I, K101E/P, K103N/S, V106A/I/M, V108I, E138A/G/K/Q/R, V179D/F/L/T, Y181C/I/V, Y188L/C/H, G190A/E/O/S, H221Y, P225H, F227C, M230I/L

<sup>g</sup> Primary PI-R mutations are: D30N, V32I, L33F, M46I/L, I47A/V, G48V, I50L/V, I54L/M, Q58E, T74P, L76V, V82A/F/L/S/T, I84V, N88S, and L90M in PR. Secondary PI-R mutations are: L10C/F/I/R/V, V11I, I13V, G16E, K20I/M/R/T/V, L24I, L33I/V, E34Q, E35G, M36I/L/V, K43T, F53L/Y, I54A/S/T/V, D60E, I62V, L63P, I64L/M/V, H69K, A71I/L/T/V, G73A/C/S/T, V77I, V82I, N83D, I85V, N86D, L89V, and I93L/M in PR.

AF: assay failure; DTG: dolutegravir; EVG: elvitegravir; IN: integrase; INSTI: integrase strand transfer inhibitor; ND: no data; PI: protease inhibitor; PID: patient identification; RAL: raltegravir; RAM: resistance-associated mutation; RTI: reverse transcriptase inhibitor; VF: virologic failure; VS: virologic success.
