# Supplementary material for: Lack of impact of pre-existing T97A HIV-1 integrase mutation on integrase strand transfer inhibitor resistance and treatment outcome
Source: PubMed Central journal article supplement (PMC5315389; doi:10.1371/journal.pone.0172206), 2017-02-17
Supplement: pone.0172206.s002.pdf [file pone.0172206.s002.pdf]

S2 Table. On-Treatment Population of Patients with Emergent T97A and Primary INSTI RAM(s) (n = 6)

| PID #                           | Study #                   | Treatment Group           | INSTI Dose | TE/TN | HIV-1 Subtype | Snapshot Outcome         | Drug Completion Reason   | Adhr Rate <sup>a</sup> | RAP <sup>b</sup> | Visit      | HIV-1 RNA | CD4                                                                    | Integrase Sequence <sup>c, d</sup>                                                                                                      | INSTI RAM(s) <sup>d</sup>                 | T97A Status      | IN Phenotypic Data <sup>e</sup> |        |        |        | RTI RAM(s) <sup>f</sup>         | PI RAM(s) <sup>g</sup>                                                                 |    |    |
|---------------------------------|---------------------------|---------------------------|------------|-------|---------------|--------------------------|--------------------------|------------------------|------------------|------------|-----------|------------------------------------------------------------------------|-----------------------------------------------------------------------------------------------------------------------------------------|-------------------------------------------|------------------|---------------------------------|--------|--------|--------|---------------------------------|----------------------------------------------------------------------------------------|----|----|
|                                 |                           |                           |            |       |               |                          |                          |                        |                  |            |           |                                                                        |                                                                                                                                         |                                           |                  | RC                              | EVG FC | RAL FC | DTG FC |                                 |                                                                                        |    |    |
| Enrolled on INSTI-based Regimen |                           |                           |            |       |               |                          |                          |                        |                  |            |           |                                                                        |                                                                                                                                         |                                           |                  |                                 |        |        |        |                                 |                                                                                        |    |    |
| 48                              | GS-US-183-0105            | EVG/r+FTC/TDF+ZDV         | 125 mg     | TE    | B             | VF (W48)                 | Study Drug Not Completed | ND                     | W48              | BL         | 8720      | 210                                                                    | S17N V72I A91E L101I K111T V113I S119R T122I T124A V234L D256E                                                                          | V72I S119R                                |                  | 102                             | 1.20   | 1.06   | ND     | M41L M184V L210W T215Y E138A    | G48V I54V V82T L10V F53L I54V I62V L63P A71I G73S V77I I93L                            |    |    |
|                                 | GS-US-183-0105            | EVG/r+FTC/TDF+ZDV         | 125 mg     | TE    | B             | VF (W48)                 | Study Drug Not Completed | ND                     | W48              | W8         | 459       | ND                                                                     | S17N T66T/A V72I A91E T97T/A L101I K111T V113I S119R T122I T124A V234L D256E                                                            | T66T/A T97T/A V72I S119R                  |                  | ND                              | ND     | ND     | ND     | ND                              | ND                                                                                     |    |    |
|                                 | GS-US-183-0105            | EVG/r+FTC/TDF+ZDV         | 125 mg     | TE    | B             | VF (W48)                 | Study Drug Not Completed | ND                     | W48              | W12        | 776       | ND                                                                     | S17N V72I A91E T97T/A L101I K111T V113I S119R T122I T124A N155N/H K160K/N E170E/A V234L D256E                                           | T97T/A N155N/H V72I S119R E170E/A         | Maintained       | ND                              | ND     | ND     | ND     | ND                              | ND                                                                                     | ND |    |
|                                 | GS-US-183-0105            | EVG/r+FTC/TDF+ZDV         | 125 mg     | TE    | B             | VF (W48)                 | Study Drug Not Completed | ND                     | W48              | W16        | 1400      | ND                                                                     | S17N V72I A91A/E T97T/A L101I K111T V113I S119R T122I T124A N155H K160K/N V234L D256E                                                   | T97T/A N155H V72I S119R                   | Maintained       | ND                              | ND     | ND     | ND     | ND                              | ND                                                                                     | ND |    |
|                                 | GS-US-183-0105            | EVG/r+FTC/TDF+ZDV         | 125 mg     | TE    | B             | VF (W48)                 | Study Drug Not Completed | ND                     | W48              | W20        | 1070      | ND                                                                     | S17N V72I A91A/E L101I K111T V113I S119R T122I T124A N155H K160K/N V234L D256E                                                          | N155H V72I S119R                          | Lost             | ND                              | ND     | ND     | ND     | ND                              | ND                                                                                     | ND |    |
|                                 | GS-US-183-0105            | EVG/r+FTC/TDF+ZDV         | 125 mg     | TE    | B             | VF (W48)                 | Study Drug Not Completed | ND                     | W48              | W24        | 4960      | ND                                                                     | S17N V72I A91A/E T97T/A L101I K111T V113I S119R T122I T124A N155H E170E/A V234L D256E                                                   | T97T/A N155H V72I S119R E170E/A           | Gained           | 65                              | 128    | 21     | ND     | ND                              | ND                                                                                     | ND |    |
| GS-US-183-0105                  | EVG/r+FTC/TDF+ZDV         | 125 mg                    | TE         | B     | VF (W48)      | Study Drug Not Completed | ND                       | W48                    | ESDD (W40)       | 6470       | ND        | S17N V72I A91A/G L101I K111T V113I S119R T122I T124A N155H V234L D256E | N155H V72I S119R                                                                                                                        | Lost                                      | ND               | ND                              | ND     | ND     | ND     | ND                              | ND                                                                                     |    |    |
| 49                              | GS-US-183-0105            | EVG/r+ABC+DRV+ENF+FTC/TDF | 125 mg     | TE    | B             | VF (W48)                 | Study Drug Completed     | ND                     | W48              | BL         | 84300     | 40                                                                     | E11D R20K S39C V72I L101I V113I S119G T122I T125A I200M V201I T206T/S V234L S255S/T                                                     | V72I S119G                                |                  | 95                              | 2.15   | 1.40   | ND     | E44E/D T69T/N M184V K103K/N     | L33F M46L I54V T74P V82A I84V L90M L10I I13V K20R M36I K43T I54V I62V L63P/T A71V I93I |    |    |
|                                 | GS-US-183-0105            | EVG/r+ABC+DRV+ENF+FTC/TDF | 125 mg     | TE    | B             | VF (W48)                 | Study Drug Completed     | ND                     | W48              | W4         | 982       | ND                                                                     | E11D R20K S39C V72I E92E/Q L101I V113I S119G T122I T125A I200M V201I V234L                                                              | E92E/Q V72I S119G                         |                  | ND                              | ND     | ND     | ND     | ND                              | ND                                                                                     | ND |    |
|                                 | GS-US-183-0105            | EVG/r+ABC+DRV+ENF+FTC/TDF | 125 mg     | TE    | B             | VF (W48)                 | Study Drug Completed     | ND                     | W48              | W8         | 32300     | ND                                                                     | E11D R20K S39C V72I E92Q L101I V113I S119G T122I T125A I200M V201I V234L                                                                | E92Q V72I S119G                           |                  | ND                              | ND     | ND     | ND     | ND                              | ND                                                                                     | ND |    |
|                                 | GS-US-183-0105            | EVG/r+ABC+DRV+ENF+FTC/TDF | 125 mg     | TE    | B             | VF (W48)                 | Study Drug Completed     | ND                     | W48              | W12        | 9290      | ND                                                                     | E11D R20K S39C V72I E92Q T97T/A L101I V113I S119G T122I T125A I200M V201I V234L                                                         | E92Q T97T/A V72I S119G                    |                  | ND                              | ND     | ND     | ND     | ND                              | ND                                                                                     | ND |    |
|                                 | GS-US-183-0105            | EVG/r+ABC+DRV+ENF+FTC/TDF | 125 mg     | TE    | B             | VF (W48)                 | Study Drug Completed     | ND                     | W48              | W16        | 3890      | ND                                                                     | E11D R20K S39C V72I E92Q T97T/A L101I V113I S119G T122I T125A I200M V201I V234L                                                         | E92Q T97T/A V72I S119G                    | Maintained       | 11                              | 113    | 27     | ND     | T69N M184V T215Y                | L33F M46L I54V T74P V82A I84V L90M L10I I13V K20R M36I K43T I54V I62V L63P/T A71V I93I |    |    |
|                                 | GS-US-183-0105            | EVG/r+ABC+DRV+ENF+FTC/TDF | 125 mg     | TE    | B             | VF (W48)                 | Study Drug Completed     | ND                     | W48              | W48        | 190       | ND                                                                     | ND                                                                                                                                      | ND                                        | ND               | Not tested again                | ND     | ND     | ND     | ND                              | ND                                                                                     | ND | ND |
|                                 | GS-US-183-0130            | EVG/r+ABC+DRV+ENF+FTC/TDF | 150 mg     | TE    | B             | VF (W48)                 | Study Drug Completed     | ND                     | -                | BL         | 190       | 122                                                                    | ND                                                                                                                                      | ND                                        | ND               | Not tested again                | ND     | ND     | ND     | ND                              | ND                                                                                     | ND | ND |
| GS-US-183-0130                  | EVG/r+ABC+DRV+ENF+FTC/TDF | 150 mg                    | TE         | B     | VF (W48)      | Study Drug Completed     | ND                       | -                      | W32              | 49         | 239       | ND                                                                     | ND                                                                                                                                      | ND                                        | Not tested again | ND                              | ND     | ND     | ND     | ND                              | ND                                                                                     | ND |    |
| 50                              | GS-US-183-0145            | RAL+ABC+LPV/r             | 400 mg     | TE    | B             | VF (W96)                 | Lack Of Efficacy         | 96%                    | W48              | BL         | 48100     | 315                                                                    | E11D E13D A21T V72I L101I V113I S119G T122I T124S K136N V234L D256E                                                                     | V72I S119G                                |                  | ND                              | 1.11   | 0.88   | ND     | L210L/W T215Y                   | L33I I64V                                                                              |    |    |
|                                 | GS-US-183-0145            | RAL+ABC+LPV/r             | 400 mg     | TE    | B             | VF (W96)                 | Lack Of Efficacy         | 96%                    | W48              | W40        | 911       | 272                                                                    | E11D E13D A21T M50M/I V72I T97T/A L101I V113I S119G T122I T124S K136N N155N/H V234L D256E                                               | T97T/A N155N/H M50M/I V72I S119G          | Gained           | ND                              | 3.54   | 2.44   | 0.82   | T215Y                           | L33I I64V                                                                              |    |    |
|                                 | GS-US-183-0145            | RAL+ABC+LPV/r             | 400 mg     | TE    | B             | VF (W96)                 | Lack Of Efficacy         | 96%                    | W48              | ESDD (W48) | 1250      | 302                                                                    | ND                                                                                                                                      | ND                                        | ND               | Not tested again                | ND     | ND     | ND     | ND                              | ND                                                                                     | ND |    |
| 51                              | GS-US-183-0145            | RAL+DRV/r+TDF             | 400 mg     | TE    | B             | VF (W96)                 | Lack Of Efficacy         | 95%                    | W48              | BL         | 177000    | 43                                                                     | E11D A23V L28I V37I V72I L101I V113I V201V/I T206S K215N D232D/E V234L D256E S283G                                                      | V72I                                      |                  | ND                              | 1.3    | 1.5    | ND     | K103N Y181C H221Y               | L63P V77I I93L                                                                         |    |    |
|                                 | GS-US-183-0145            | RAL+DRV/r+TDF             | 400 mg     | TE    | B             | VF (W96)                 | Lack Of Efficacy         | 95%                    | W48              | W8         | 716000    | 74                                                                     | E11D A23V L28I V37I V72I L101I V113I V201V/I T206S K215N D232D/E V234L D256E S283G                                                      | V72I                                      |                  | ND                              | 1.3    | 1.2    | ND     | K103N Y181C H221Y               | L63P V77I I93L                                                                         |    |    |
|                                 | GS-US-183-0145            | RAL+DRV/r+TDF             | 400 mg     | TE    | B             | VF (W96)                 | Lack Of Efficacy         | 95%                    | W48              | W20        | 38800     | 100                                                                    | E11D A23V L28I V37I V72I L101I V113I V201V/I T206S K215N D232D/E V234L D256E S283G                                                      | V72I                                      |                  | ND                              | 1.4    | 1.1    | ND     | K103N Y181C H221Y               | L63P V77I I93L                                                                         |    |    |
|                                 | GS-US-183-0145            | RAL+DRV/r+TDF             | 400 mg     | TE    | B             | VF (W96)                 | Lack Of Efficacy         | 95%                    | W48              | W48        | 24200     | 83                                                                     | E11D A23V L28I V37I D41D/N G70G/R V72I T97T/A L101I V113I P142P/T V151V/I N155N/H E157E/Q V201V/I T206S K215N D232D/E V234L D256E S283G | T97T/A N155N/H V72I V151V/I E157E/Q       |                  | ND                              | 21     | 12.8   | ND     | K65K/R K70K/E K103N Y181C H221Y | M36M/I L63P V77I I93L                                                                  |    |    |
|                                 | GS-US-183-0145            | RAL+DRV/r+TDF             | 400 mg     | TE    | B             | VF (W96)                 | Lack Of Efficacy         | 95%                    | W48              | ESDD (W56) | 32900     | 118                                                                    | E11D A23V L28I V37I D41D/N V72I T97T/A L101I T112T/A V113I S119S/R V151V/I N155H E157E/Q V201I T206S K215N D232D/E V234L D256E S283G    | T97T/A N155H V72I S119S/R V151V/I E157E/Q | Maintained       | ND                              | 72     | 57     | 1.46   | K65R K103N Y181C H221Y          | L63P V77I I93L                                                                         |    |    |

| PID # | Study #        | Treatment Group       | INSTI Dose | TE/TN | HIV-1 Subtype | Snapshot Outcome | Drug Completion Reason   | Adhr Rate <sup>a</sup> | RAP <sup>b</sup> | Visit       | HIV-1 RNA | CD4 | Integrase Sequence <sup>c, d</sup>                                                                     | INSTI RAM(s) <sup>d</sup>  | T97A Status | IN Phenotypic Data <sup>e</sup> |        |        |        | RTI RAM(s) <sup>f</sup>                     | PI RAM(s) <sup>g</sup>                                                          |  |
|-------|----------------|-----------------------|------------|-------|---------------|------------------|--------------------------|------------------------|------------------|-------------|-----------|-----|--------------------------------------------------------------------------------------------------------|----------------------------|-------------|---------------------------------|--------|--------|--------|---------------------------------------------|---------------------------------------------------------------------------------|--|
|       |                |                       |            |       |               |                  |                          |                        |                  |             |           |     |                                                                                                        |                            |             | RC                              | EVG FC | RAL FC | DTG FC |                                             |                                                                                 |  |
| 52    | GS-US-183-0105 | EVG/r+ABC+ddl         | 150 mg     | TE    | B             | VS (48)          | ND                       | ND                     | -                | BL          | 49100     | 597 | V72I L101I T112I V113I S119G T122I T124T/A/D/N T125T/A I182V V201V/I Q216H/N T218T/S V234L D256E       | V72I S119G                 |             | ND                              | ND     | ND     | ND     | M41L L210W T215Y K103N                      | L33F M46L I84I/V N88S L90L/M L10I I13V K20R M36I I62V L63L/P I64V A71A/V G73G/S |  |
|       | GS-US-183-0130 | EVG/r+ABC+ddl         | 150 mg     | TE    | B             | VF (W48)         | Study Drug Not Completed | 97%                    | W192             | BL          | <50       | 398 | V72I L101I T112I V113I S119G T122I T124T/A/D/N T125T/A I182V V201V/I Q216H/N T218T/S V234L D256E       | V72I S119G                 |             | ND                              | ND     | ND     | ND     | M41L L210W T215Y K103N                      | L33F M46L I84I/V N88S L90L/M L10I I13V K20R M36I I62V L63L/P I64V A71A/V G73G/S |  |
|       | GS-US-183-0130 | EVG/r+ABC+ddl         | 150 mg     | TE    | B             | VF (W48)         | Study Drug Not Completed | 97%                    | W192             | W93         | 268       | 446 | V31I K34K/N V72I T97A L101I V113L S119R T122I T124N N155H V201I Q216H T218T/S V234L D256E              | T97A N155H V72I S119R      |             | ND                              | >140   | 115    | ND     | ND                                          |                                                                                 |  |
|       | GS-US-183-0130 | EVG/r+ABC+ddl         | 150 mg     | TE    | B             | VF (W48)         | Study Drug Not Completed | 97%                    | W192             | ESDD (W105) | 1690      | 480 | V31I V72I T97A L101I V113L S119R T122I T124N N155H H171H/P V201I Q216H V234L D256E                     | T97A N155H V72I S119R      | Maintained  | ND                              | >134   | 146    | ND     | M41L L74L/V V118V/I M184V L210W T215Y K103N | L33F M46L L10I I13V K20R M36I I62V L63P I64I/L/V A71V                           |  |
| 53    | GS-US-183-0105 | EVG/r+ABC+ddl+FTC/TDF | 50 mg      | TE    | B             | VS (W48)         | ND                       | ND                     | -                | BL          | 160000    | NA  | E11D S24N V72I L101I K111Q V113I S119T T125T/A M154I E212A Q216H V234L                                 | V72I S119T                 |             | ND                              | ND     | ND     | ND     | M41L T215Y E138A                            | M46I N88D L90M L63P A71V V77I N88D I93L                                         |  |
|       | GS-US-183-0130 | EVG/r+ABC+ddl+FTC/TDF | 150 mg     | TE    | B             | VF (W48)         | Study Drug Not Completed | 100%                   | W192             | BL          | 52        | 366 | E11D S24N V72I L101I K111Q V113I S119T T125T/A M154I E212A Q216H V234L                                 | V72I S119T                 |             | ND                              | ND     | ND     | ND     | M41L T215Y E138A                            | M46I N88D L90M L63P A71V V77I N88D I93L                                         |  |
|       | GS-US-183-0130 | EVG/r+ABC+ddl+FTC/TDF | 150 mg     | TE    | B             | VF (W48)         | Study Drug Not Completed | 100%                   | W192             | W84         | 17000     | 332 | E11D S24N V72I E92Q T97A L101I K111Q V113I S119T T125A S153A M154I E212A Q216H V234L                   | E92Q T97A V72I S119T S153A |             | ND                              | >129   | 28     | ND     | M41L M184V T215Y E138A                      | M46I N88D L90M L63P A71V V77I N88D I93L                                         |  |
|       | GS-US-183-0130 | EVG/r+ABC+ddl+FTC/TDF | 150 mg     | TE    | B             | VF (W48)         | Study Drug Not Completed | 100%                   | W192             | ESDD (W96)  | 32300     | 417 | E11D S24N V72I E92Q T97A L101I K111Q T112T/A V113I S119T T124T/A T125A S153A M154M/I E212A Q216H V234L | E92Q T97A V72I S119T S153A | Maintained  | ND                              | >134   | 18.90  | ND     | M41L M184V T215Y E138A                      | M46I N88D L90M L63P A71V V77I N88D I93L                                         |  |

<sup>a</sup> Overall adherence rate as determined by pill count in returned pill bottles.

<sup>b</sup> The resistance analysis population (RAP) included subjects with either 1) virologic rebound (VR): HIV-1 RNA  $\geq 50$  copies/mL at any visit , that is confirmed and  $\geq 400$  copies/mL at the next scheduled or unscheduled visit; or 2) Discontinuation from study with HIV-1 RNA  $\geq 400$  copies/mL at last visit (Last) while receiving study drugs (or within 72 hours of discontinuation). Subjects who were not receiving study drugs within 72 hours prior to virologic rebound (Off SD) were not analyzed for resistance.

<sup>c</sup> Monogram Biosciences (South San Francisco, CA) GeneSeq™ Integrase or GenoSure™ Integrase assay

<sup>d</sup> Post-baseline IN sequence was compared to Baseline (BL) or Screening (SCR) IN sequence with emergent RAMs shown in bold. Primary INSTI RAMs are: T66A/I/K, E92G/Q, T97A, Y143C/H/R, S147G, Q148H/K/R, and N155H. Secondary INSTI RAMs are: M50I, H51Y, L68I/V, V72A/N/T, L74I/M, Q95K/R, G118R, S119G/P/R/T, F121C/Y, A128T, E138A/K, G140A/C/S, P145S, Q146I/K/L/P/R, V151A/L, S153A/F/Y, E157K/Q, G163K/R, E170A, and R263K. Other variants at IN positions associated with INSTI RAMs are also indicated.

<sup>e</sup> Monogram Biosciences (South San Francisco, CA) PhenoSense™ Integrase assay. Replication capacity (RC) expressed as % of wild-type control. Drug susceptibility data expressed as EC<sub>50</sub> fold change (FC) from wild-type control.

<sup>f</sup> NRTI mutations are: M41L, E44D, A62V, K65R, D67N, T69D/N, T69 insertion, K70E/R, L74I/V, V75I, F77L, Y115F, F116Y, V118I, Q151M, M184I/V, L210W, T215F/Y, and K219E/N/O/R in RT. NNRTI-R mutations are: V90I, A98G, L100H/I, K101E/P, K103N/S, V106A/I/M, V108I, E138A/G/K/Q/R, V179D/F/L/T, Y181C/I/V, Y188L/C/H, G190A/E/Q/S, H221Y, P225H, F227C, M230I/L

<sup>g</sup> Primary PI-R mutations are: D30N, V32I, L33F, M46I/L, I47A/V, G48V, I50L/V, I54L/M, Q58E, T74P, L76V, V82A/F/L/S/T, I84V, N88S, and L90M in PR. Secondary PI-R mutations are: L10C/F/I/R/V, V11I, I13V, G16E, K20I/M/R/T/V, L24I, L33I/V, E34Q, E35G, M36I/L/V, K43T, F53L/Y, I54A/S/T/V, D60E, I62V, L63P, I64L/M/V, H69K, A71I/L/T/V, G73A/C/S/T, V77I, V82I, N83D, I85V, N88D, L89V, and I93L/M in PR.

AF: assay failure; DTG: dolutegravir; EVG: elvitegravir; IN: integrase; INSTI: integrase strand transfer inhibitor; ND: no data; PI: protease inhibitor; PID: patient identification; RAL: raltegravir; RAM: resistance-associated mutation; RTI: reverse transcriptase inhibitor; VF: virologic failure; VS: virologic success.
