# Supplementary material for: Lack of impact of pre-existing T97A HIV-1 integrase mutation on integrase strand transfer inhibitor resistance and treatment outcome
Source: PubMed Central journal article supplement (PMC5315389; doi:10.1371/journal.pone.0172206), 2017-02-17
Supplement: pone.0172206.s003.pdf [file pone.0172206.s003.pdf]

S3 Table. On-Treatment Population of Patients with Emergent T97A Alone (n = 8)

| PID #                           | Study #        | Treatment Group  | INSTI Dose | TE/TN | HIV-1 Subtype | Snapshot Outcome | Drug Completion Reason | Adhr Rate <sup>a</sup> | RAP <sup>b</sup> | Visit       | HIV-1 RNA | CD4 | Integrase Sequence <sup>c, d</sup>                                                                          | INSTI RAM(s) <sup>d</sup> | T97A Status      | IN Phenotypic Data <sup>e</sup> |        |        |        | RTI RAM(s) <sup>f</sup>                                          | PI RAM(s) <sup>g</sup>                                         |
|---------------------------------|----------------|------------------|------------|-------|---------------|------------------|------------------------|------------------------|------------------|-------------|-----------|-----|-------------------------------------------------------------------------------------------------------------|---------------------------|------------------|---------------------------------|--------|--------|--------|------------------------------------------------------------------|----------------------------------------------------------------|
|                                 |                |                  |            |       |               |                  |                        |                        |                  |             |           |     |                                                                                                             |                           |                  | RC                              | EVG FC | RAL FC | DTG FC |                                                                  |                                                                |
| Enrolled on INSTI-based Regimen |                |                  |            |       |               |                  |                        |                        |                  |             |           |     |                                                                                                             |                           |                  |                                 |        |        |        |                                                                  |                                                                |
| 54                              | GS-US-236-0103 | EVG/COBI/FTC/TDF | 150 mg     | TN    | B             | VF (W144)        | Lack Of Efficacy       | 88%                    | W144             | BL          | 151000    | ND  | E11D S17T V37I V72I E96D L101I K111R V113I S119R T125A K156N D167D/E V201I T218T/S V234L D256E              | V72I S119R                |                  | 62                              | ND     | ND     | ND     | V106I                                                            | I62V A71T V77I                                                 |
|                                 | GS-US-236-0103 | EVG/COBI/FTC/TDF | 150 mg     | TN    | B             | VF (W144)        | Lack Of Efficacy       | 88%                    | W144             | W120        | 4700      | ND  | E11D S17T V37I V72I E96D T97A L101I K111R V113I S119R T125A K156N D167E V201I K211R V234F/L D256E           | T97A V72I S119R           |                  | ND                              | ND     | ND     | ND     | M184M/I/V V106I                                                  | I62V A71T V77I                                                 |
|                                 | GS-US-236-0103 | EVG/COBI/FTC/TDF | 150 mg     | TN    | B             | VF (W144)        | Lack Of Efficacy       | 88%                    | W144             | W132        | 2480      | 184 | E11D S17T V37I V72I E96D T97A L101I K111R V113I S119R T125A K156N G163G/R D167E V201I K211K/R V234L D256E   | T97A V72I S119R G163G/R   | Maintained       | 59                              | ND     | ND     | ND     | M184V V106I                                                      | I62V A71T V77I                                                 |
|                                 | GS-US-236-0103 | EVG/COBI/FTC/TDF | 150 mg     | TN    | B             | VF (W144)        | Lack Of Efficacy       | 88%                    | W144             | ESDD (W144) | <50       | ND  | ND                                                                                                          | ND                        | Not tested again | ND                              | ND     | ND     | ND     | ND                                                               | ND                                                             |
| 55                              | GS-US-183-0145 | EVG/r+ETR+LPV    | 150 mg     | TE    | B             | VS (W96)         | Withdrew Consent       | 99%                    | -                | BL          | 4260      | 478 | K7R D25E V31I K111T S119P T122I T124N T206S V234I A265V D286N                                               | S119P                     |                  | ND                              | ND     | ND     | ND     | M41L T69T/I L74L/I V118I M184V L210W T215Y K219K/E K103N V108V/I | I62V                                                           |
|                                 | GS-US-183-0145 | EVG/r+ETR+LPV    | 150 mg     | TE    | B             | VS (W96)         | Withdrew Consent       | 99%                    | -                | ESDD (W144) | 91800     | 333 | K14K/R V31I T97T/A K111T V113V/I S119P T122T/I T124H/N T125T/A T206S V234I A265V D286N                      | T97T/A S119P              |                  | ND                              | 1.27   | 0.88   | ND     |                                                                  |                                                                |
| 56                              | GS-US-183-0145 | EVG/r+TDF+DRV    | 150 mg     | TE    | B             | VF (W96)         | Subject Non-Compliance | 94%                    | W96              | BL          | 12200     | 115 | V72I L101I G106G/A V113I T124A K156N V201I I217V V234L P261S R262L                                          | V72I                      |                  | 115                             | 0.78   | 0.61   | ND     | K103N                                                            | L10I M36I I93L                                                 |
|                                 | GS-US-183-0145 | EVG/r+TDF+DRV    | 150 mg     | TE    | B             | VF (W96)         | Subject Non-Compliance | 94%                    | W96              | W12         | 8320      | 137 | V72I P90P/S L101I V113I T124A K156N V201I I217V V234L/F                                                     | V72I                      |                  | 48                              | 0.96   | 0.50   | ND     | K103N                                                            | L10I M36I I93L                                                 |
|                                 | GS-US-183-0145 | EVG/r+TDF+DRV    | 150 mg     | TE    | B             | VF (W96)         | Subject Non-Compliance | 94%                    | W96              | W24         | 567       | 231 | V72I L101I V113I T124A K156N V201I I217V V234L                                                              | V72I                      |                  | 133                             | 1.14   | 0.54   | ND     | K103N                                                            | L10I M36I I93L                                                 |
|                                 | GS-US-183-0145 | EVG/r+TDF+DRV    | 150 mg     | TE    | B             | VF (W96)         | Subject Non-Compliance | 94%                    | W96              | W56         | 12800     | 134 | V72I L101I V113I T124A K156N Q164E V201I I217V V234L                                                        | V72I                      |                  | ND                              | 1.04   | 0.46   | ND     | ND                                                               | L10I M36I I93L                                                 |
|                                 | GS-US-183-0145 | EVG/r+TDF+DRV    | 150 mg     | TE    | B             | VF (W96)         | Subject Non-Compliance | 94%                    | W96              | W72         | 2410      | 154 | V31V/M/I V72N/I T97T/A L101I V113I T124A K156N V201I I217V V234L                                            | T97T/A V72N/I             |                  | ND                              | 1.93   | 0.6    | ND     |                                                                  | L10I M36I I93L                                                 |
|                                 | GS-US-183-0145 | EVG/r+TDF+DRV    | 150 mg     | TE    | B             | VF (W96)         | Subject Non-Compliance | 94%                    | W96              | W96         | 53        | 142 | ND                                                                                                          | ND                        | Not tested again | ND                              | ND     | ND     | ND     | ND                                                               | ND                                                             |
|                                 | GS-US-183-0145 | EVG/r+TDF+DRV    | 150 mg     | TE    | B             | VF (W96)         | Subject Non-Compliance | 94%                    | W96              | ESDD (W112) | 4580      | 134 | ND                                                                                                          | ND                        | Not tested again | ND                              | ND     | ND     | ND     | ND                                                               | ND                                                             |
| 57                              | GS-US-183-0145 | RAL+ABC+LPV/r    | 400 mg     | TE    | B             | VF (W96)         | Subject Non-Compliance | 84%                    | W144             | BL          | 98100     | 209 | D6E E10D V72V/I A91S V113I S119G T122I T124A T125A I220L Y227F V234I                                        | V72V/I S119G              |                  | 106                             | 1.44   | 0.96   | ND     | D67N                                                             | I62V L63P A71T V77I I93L                                       |
|                                 | GS-US-183-0145 | RAL+ABC+LPV/r    | 400 mg     | TE    | B             | VF (W96)         | Subject Non-Compliance | 84%                    | W144             | W12         | 26700     | 203 | D6E E10D V72V/I A91A/S V113I S119G T122I T124A T125A I220L Y227F V234I                                      | V72V/I S119G              |                  | ND                              | 1.32   | 0.89   | ND     | D67N                                                             | I62V L63P A71T V77I I93L                                       |
|                                 | GS-US-183-0145 | RAL+ABC+LPV/r    | 400 mg     | TE    | B             | VF (W96)         | Subject Non-Compliance | 84%                    | W144             | W104        | 99800     | 251 | D6E E10D L74L/M A91S T97A K103K/R V113I S119G T122I T124A T125A V151V/I I220L Y227F V234I                   | T97A L74L/M S119G V151V/I |                  | 58                              | 8.95   | 2.19   | 0.57   |                                                                  |                                                                |
|                                 | GS-US-183-0145 | RAL+ABC+LPV/r    | 400 mg     | TE    | B             | VF (W96)         | Subject Non-Compliance | 84%                    | W144             | ESDD (W112) | 68500     | 357 | ND                                                                                                          | ND                        | Not tested again | ND                              | ND     | ND     | ND     | ND                                                               | ND                                                             |
| 58                              | GS-US-183-0145 | RAL+ABC+LPV/r    | 400 mg     | TE    | B             | VF (W96)         | Lack Of Efficacy       | 92%                    | W48              | BL          | 22400     | 381 | E10D R20R/K M50I V72I L101I T112I V113I S119P T124A T125A I135L T206S V234L D279D/N                         | M50I V72I S119P           |                  | 65                              | 1.27   | 0.74   | ND     | D67N K70R K103N P225H                                            | V32I L90M L10I K20R M36I K43T I64V G73C I85V                   |
|                                 | GS-US-183-0145 | RAL+ABC+LPV/r    | 400 mg     | TE    | B             | VF (W96)         | Lack Of Efficacy       | 92%                    | W48              | W24         | 5320      | 440 | D6D/N E10D S39S/G M50I V72I L74M T97A L101I T112I V113I S119P T124A T125A I135L T206S V234L D279N           | T97A M50I V72I L74M S119P |                  | 49                              | 9.94   | 2.61   | 0.55   | D67D/N K70K/R K103K/N V179V/D P225P/H                            | V32V/I L90L/M L10L/I K20K/R M36M/I K43K/T I64I/V G73G/C I85I/V |
|                                 | GS-US-183-0145 | RAL+ABC+LPV/r    | 400 mg     | TE    | B             | VF (W96)         | Lack Of Efficacy       | 92%                    | W48              | ESDD (W40)  | 51000     | 384 | E10D M50I V72I L101I/V T112I V113I S119P T124A T125A K136K/E G163G/R T206S V234L R269R/K D279D/N D288D/N    | M50I V72I S119P G163G/R   | Lost             | ND                              | 1.50   | 1.09   | ND     | K103K/N V179V/I                                                  | K43K/T I64I/V                                                  |
| 59                              | GS-US-183-0145 | EVG/r+MVC+DRV    | 150 mg     | TE    | B             | VF (W96)         | Study Drug Completed   | 97%                    | W48              | BL          | 82800     | 157 | K14R R20R/K V72I A91E L101I V113I S119R T124N G193D V201I T206S I208I/L V234L D256D/E I268L R269R/K D270D/H | V72I S119R                |                  | 177                             | 1.21   | 0.97   | ND     | L74I M184V K103N G190A                                           | M36I L63P                                                      |
|                                 | GS-US-183-0145 | EVG/r+MVC+DRV    | 150 mg     | TE    | B             | VF (W96)         | Study Drug Completed   | 97%                    | W48              | W40         | 1180      | 332 | K14R R20R/K V72I A91E T97A L101I V113I S119R T124N G193D V201I T206S I208I/L V234L I268L D279G              | T97A V72I S119R           |                  | 66                              | 5.37   | 2.18   | ND     | K103N                                                            | L10L/F M36M/I L63P I93I/L                                      |
|                                 | GS-US-183-0145 | EVG/r+MVC+DRV    | 150 mg     | TE    | B             | VF (W96)         | Study Drug Completed   | 97%                    | W48              | W48         | 1060      | 321 | K14R R20R/K V72I A91E T97A L101I V113I S119R T124N G193D V201I T206S I208I/L V234L I268L D279G              | T97A V72I S119R           | Maintained       | ND                              | 4.64   | 1.93   | ND     | K103N                                                            | L63P I93I/L                                                    |
|                                 | GS-US-183-0145 | EVG/r+MVC+DRV    | 150 mg     | TE    | B             | VF (W96)         | Study Drug Completed   | 97%                    | W48              | W96         | 595       | 453 | K14R V72I A91E T97A L101I T112A V113I S119R T124N G193D V201I T206S I208L V234L/F I268L R269R/K D279G       | T97A V72I S119R           | Maintained       | 6.3                             | 6.62   | 2.99   | 0.7    | ND                                                               | ND                                                             |
|                                 | GS-US-183-0145 | EVG/r+MVC+DRV    | 150 mg     | TE    | B             | VF (W96)         | Study Drug Completed   | 97%                    | W48              | W144        | 410       | 461 | ND                                                                                                          | ND                        | Not tested again | ND                              | ND     | ND     | ND     | ND                                                               | ND                                                             |
|                                 | GS-US-183-0145 | EVG/r+MVC+DRV    | 150 mg     | TE    | B             | VF (W96)         | Study Drug Completed   | 97%                    | W48              | W144        | OL        | 305 | 751                                                                                                         | ND                        | ND               | Not tested again                | ND     | ND     | ND     | ND                                                               | ND                                                             |

| PID # | Study #        | Treatment Group   | INSTI Dose | TE/TN | HIV-1 Subtype | Snapshot Outcome | Drug Completion Reason | Adhr Rate <sup>a</sup> | RAP <sup>b</sup> | Visit      | HIV-1 RNA | CD4 | Integrase Sequence <sup>c, d</sup>                                                           | INSTI RAM(s) <sup>d</sup>     | T97A Status                 | IN Phenotypic Data <sup>e</sup> |        |        |        | RTI RAM(s) <sup>f</sup>                  | PI RAM(s) <sup>g</sup>                             |
|-------|----------------|-------------------|------------|-------|---------------|------------------|------------------------|------------------------|------------------|------------|-----------|-----|----------------------------------------------------------------------------------------------|-------------------------------|-----------------------------|---------------------------------|--------|--------|--------|------------------------------------------|----------------------------------------------------|
|       |                |                   |            |       |               |                  |                        |                        |                  |            |           |     |                                                                                              |                               |                             | RC                              | EVG FC | RAL FC | DTG FC |                                          |                                                    |
| 60    | GS-US-183-0145 | EVG/r+TDF+DRV     | 150 mg     | TE    | B             | VF (W96)         | Lack Of Efficacy       | 96%                    | W48              | BL         | 30400     | 287 | S39C M50I V72I L101I V113I S119P M154L K173K/R Q177Q/L V201I T206S T218S V234L               | M50I V72I S119P               |                             | 106                             | 1.31   | 1.13   | ND     | V90V/I                                   | I93I/L                                             |
|       | GS-US-183-0145 | EVG/r+TDF+DRV     | 150 mg     | TE    | B             | VF (W96)         | Lack Of Efficacy       | 96%                    | W48              | W20        | 5700      | 263 | S39C M50I V72I L101I V113I S119P <b>T125T/A</b> M154L V201I T206S T218S V234L <b>S255S/G</b> | M50I V72I S119P               |                             | 133                             | 2.13   | 0.86   | ND     | V90V/I                                   | I93I/L                                             |
|       | GS-US-183-0145 | EVG/r+TDF+DRV     | 150 mg     | TE    | B             | VF (W96)         | Lack Of Efficacy       | 96%                    | W48              | W48        | 22400     | 284 | S39C M50I V72I <b>V77V/A T97T/A</b> L101I V113I S119P M154L V201I T206S T218S V234L          | <b>T97T/A</b> M50I V72I S119P |                             | ND                              | 3.92   | 1.05   | ND     | <b>K219K/R</b> V90V/I                    |                                                    |
|       | GS-US-183-0145 | EVG/r+TDF+DRV     | 150 mg     | TE    | B             | VF (W96)         | Lack Of Efficacy       | 96%                    | W48              | ESDD (W56) | 27700     | 292 | S39C M50I V72I <b>T97A</b> L101I V113I S119P M154L V201I T206S T218S V234L                   | <b>T97A</b> M50I V72I S119P   | Maintained                  | ND                              | 6.64   | 1.65   | 0.7    | <b>K219K/R</b> V90V/I                    |                                                    |
| 61    | GS-US-183-0145 | EVG/r+FTC/TDF+LPV | 150 mg     | TE    | B             | VF (W96)         | Subject Non-Compliance | 78%                    | W48              | SCR        | 570       | 567 | S17N L28I V32V/I S39C M50M/I V113I E138E/K V201I K211Q V234L                                 | M50M/I E138E/K                |                             | 170                             | 1.21   | 0.91   | ND     | M41L D67N K70R M184M/V T215Y K219E E138A | I54L L10I I13I/V G16E D60E L63P I93L               |
|       | GS-US-183-0145 | EVG/r+FTC/TDF+LPV | 150 mg     | TE    | B             | VF (W96)         | Subject Non-Compliance | 78%                    | W48              | W12        | 773       | 506 | S17N L28I S39C M50M/I <b>T97T/A</b> V113I <b>K156K/R</b> V201I K211Q V234L <b>S283S/G</b>    | <b>T97T/A</b> M50M/I          |                             | 62                              | 1.56   | 0.79   | ND     | M41L D67N K70R M184M/V T215Y K219E E138A | I54L L10I I13I/V G16E D60E L63P <b>I85I/V</b> I93L |
|       | GS-US-183-0145 | EVG/r+FTC/TDF+LPV | 150 mg     | TE    | B             | VF (W96)         | Subject Non-Compliance | 78%                    | W48              | ESDD (W24) | 1330      | 557 | S17N L28I S39C M50M/I <b>T66T/A</b> V113I <b>T124T/A S147S/G</b> V201I K211Q V234L           | <b>T66T/A S147S/G</b> M50M/I  | Switched INSTI-R pathway(s) | ND                              | 5.00   | 1.05   | 0.73   | ND                                       | ND                                                 |

<sup>a</sup> Overall adherence rate as determined by pill count in returned pill bottles.

<sup>b</sup> The resistance analysis population (RAP) included subjects with either 1) virologic rebound (VR): HIV-1 RNA  $\geq 50$  copies/mL at any visit, that is confirmed and  $\geq 400$  copies/mL at the next scheduled or unscheduled visit; or 2) Discontinuation from study with HIV-1 RNA  $\geq 400$  copies/mL at last visit (Last) while receiving study drugs (or within 72 hours of discontinuation). Subjects who were not receiving study drugs within 72 hours prior to virologic rebound (Off SD) were not analyzed for resistance.

<sup>c</sup> Monogram Biosciences (South San Francisco, CA) GeneSeq<sup>TM</sup> Integrase or GenoSure<sup>TM</sup> Integrase assay

<sup>d</sup> Post-baseline IN sequence was compared to Baseline (BL) or Screening (SCR) IN sequence with emergent RAMs shown in **bold**. Primary INSTI RAMs are: T66A/I/K, E92G/Q, T97A, Y143C/H/R, S147G, Q148H/K/R, and N155H. Secondary INSTI RAMs are: M50I, H51Y, L68I/V, V72A/N/T, L74I/M, Q95K/R, T97A, G118R, S119G/P/R/T, F121C/Y, A128T, E138A/K, G140A/C/S, P145S, Q146I/K/L/P/R, V151A/L, S153A/F/Y, E157K/Q, G163K/R, E170A, and R263K. Other variants at IN positions associated with INSTI RAMs are also indicated.

<sup>e</sup> Monogram Biosciences (South San Francisco, CA) PhenoSense<sup>TM</sup> Integrase assay. Replication capacity (RC) expressed as % of wild-type control. Drug susceptibility data expressed as EC<sub>50</sub> fold change (FC) from wild-type control.

<sup>f</sup> NRTI mutations are: M41L, E44D, A62V, K65R, D67N, T69D/N, T69 insertion, K70E/R, L74I/V, V75I, F77L, Y115F, F116Y, V118I, Q151M, M184I/V, L210W, T215F/Y, and K219E/N/Q/R in RT. NNRTI-R mutations are: V90I, A98G, L100H/I, K101E/P, K103N/S, V106A/I/M, V108I, E138A/G/K/Q/R, V179D/F/L/T, Y181C/I/V, Y188L/C/H, G190A/E/Q/S, H221Y, P225H, F227C, M230I/L

<sup>g</sup> Primary PI-R mutations are: D30N, V32I, L33F, M46I/L, I47A/V, G48V, I50L/V, I54L/M, O58E, T74P, L76V, V82A/F/L/S/T, I84V, N88S, and L90M in PR. Secondary PI-R mutations are: L10C/F/I/R/V, V11I, I13V, G16E, K20I/M/R/T/V, L24I, L33I/V, E34Q, E35G, M36I/L/V, K43T, F53L/Y, I54A/S/T/V, D60E, I62V, L63P, I64L/M/V, H69K, A71I/L/T/V, G73A/C/S/T, V77I, V82I, N83D, I85V, N88D, L89V, and I93L/M in PR.

AF: assay failure; DTG: dolutegravir; EVG: elvitegravir; IN: integrase; INSTI: integrase strand transfer inhibitor; ND: no data; PI: protease inhibitor; PID: patient identification; RAL: raltegravir; RAM: resistance-associated mutation; RTI: reverse transcriptase inhibitor; VF: virologic failure; VS: virologic success.
