# Supplementary material for: Lack of impact of pre-existing T97A HIV-1 integrase mutation on integrase strand transfer inhibitor resistance and treatment outcome
Source: PubMed Central journal article supplement (PMC5315389; doi:10.1371/journal.pone.0172206), 2017-02-17

S1 Fig. Pre-Treatment Population of Patients with Pre-Existing T97A (n = 47): Longitudinal Plots

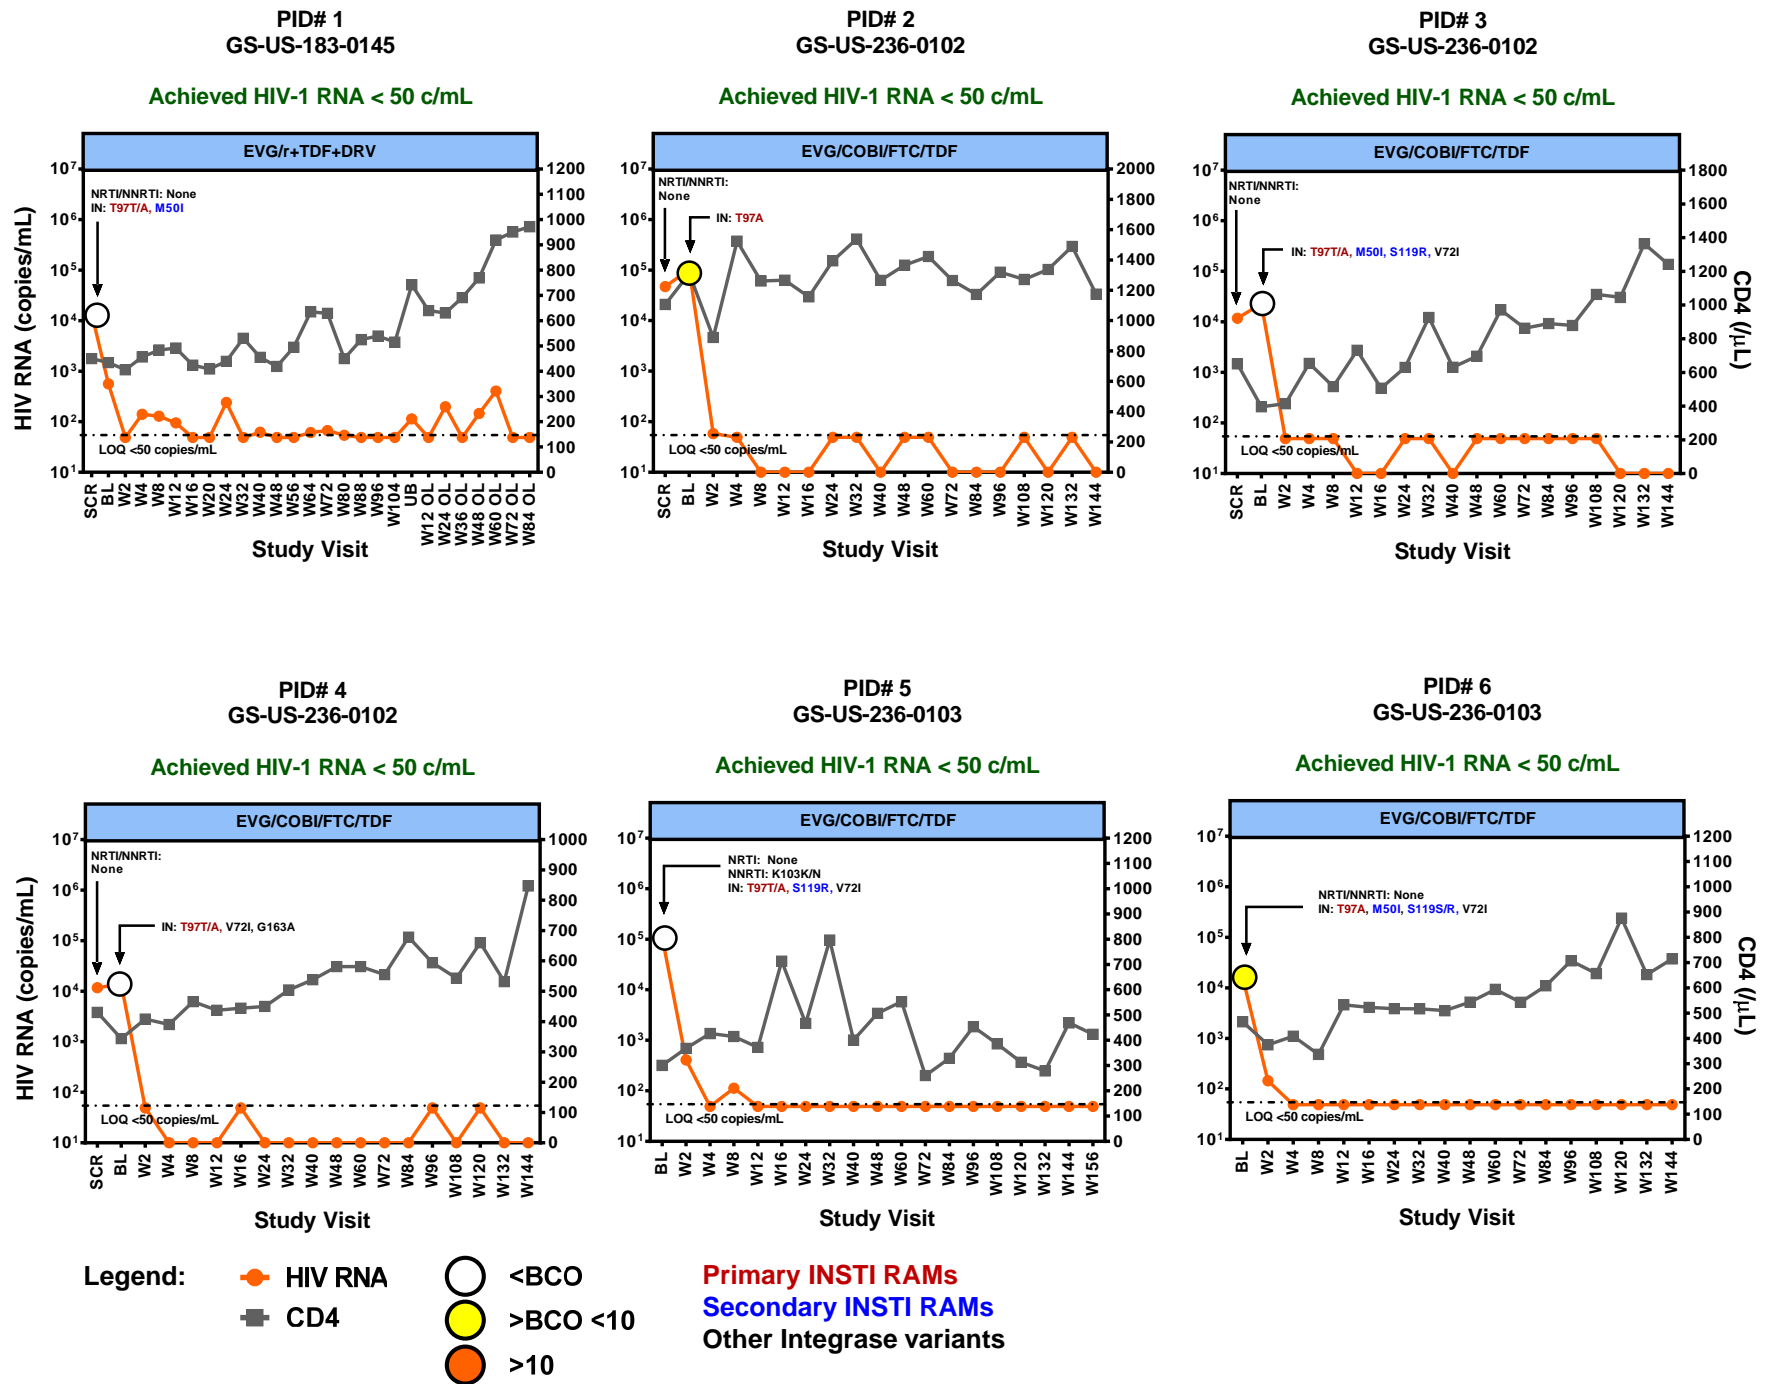

S1 Fig. Pre-Treatment Population of Patients with Pre-Existing T97A (n = 47): Longitudinal Plots (con't)

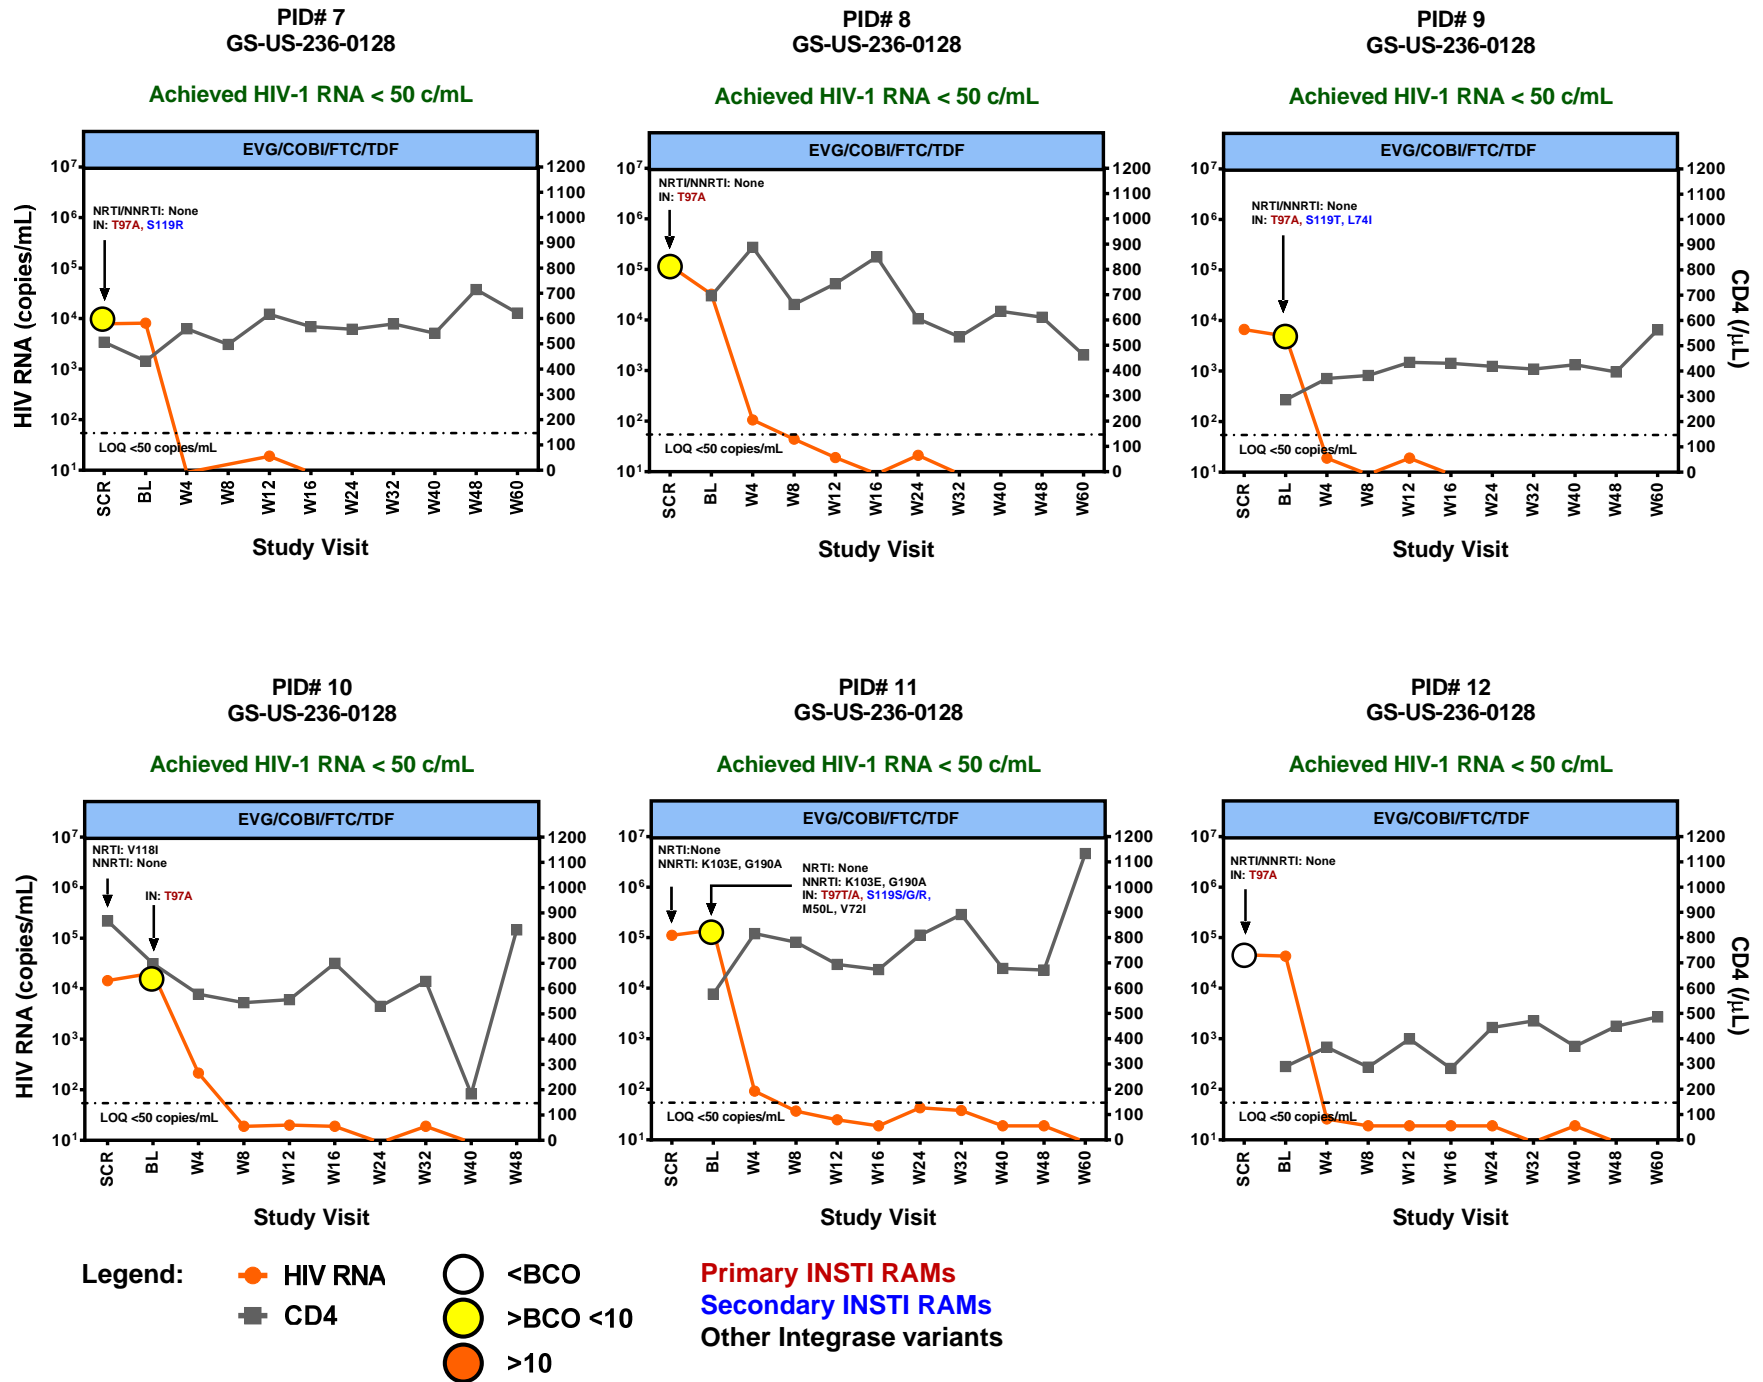

S1 Fig. Pre-Treatment Population of Patients with Pre-Existing T97A (n = 47): Longitudinal Plots (con't)

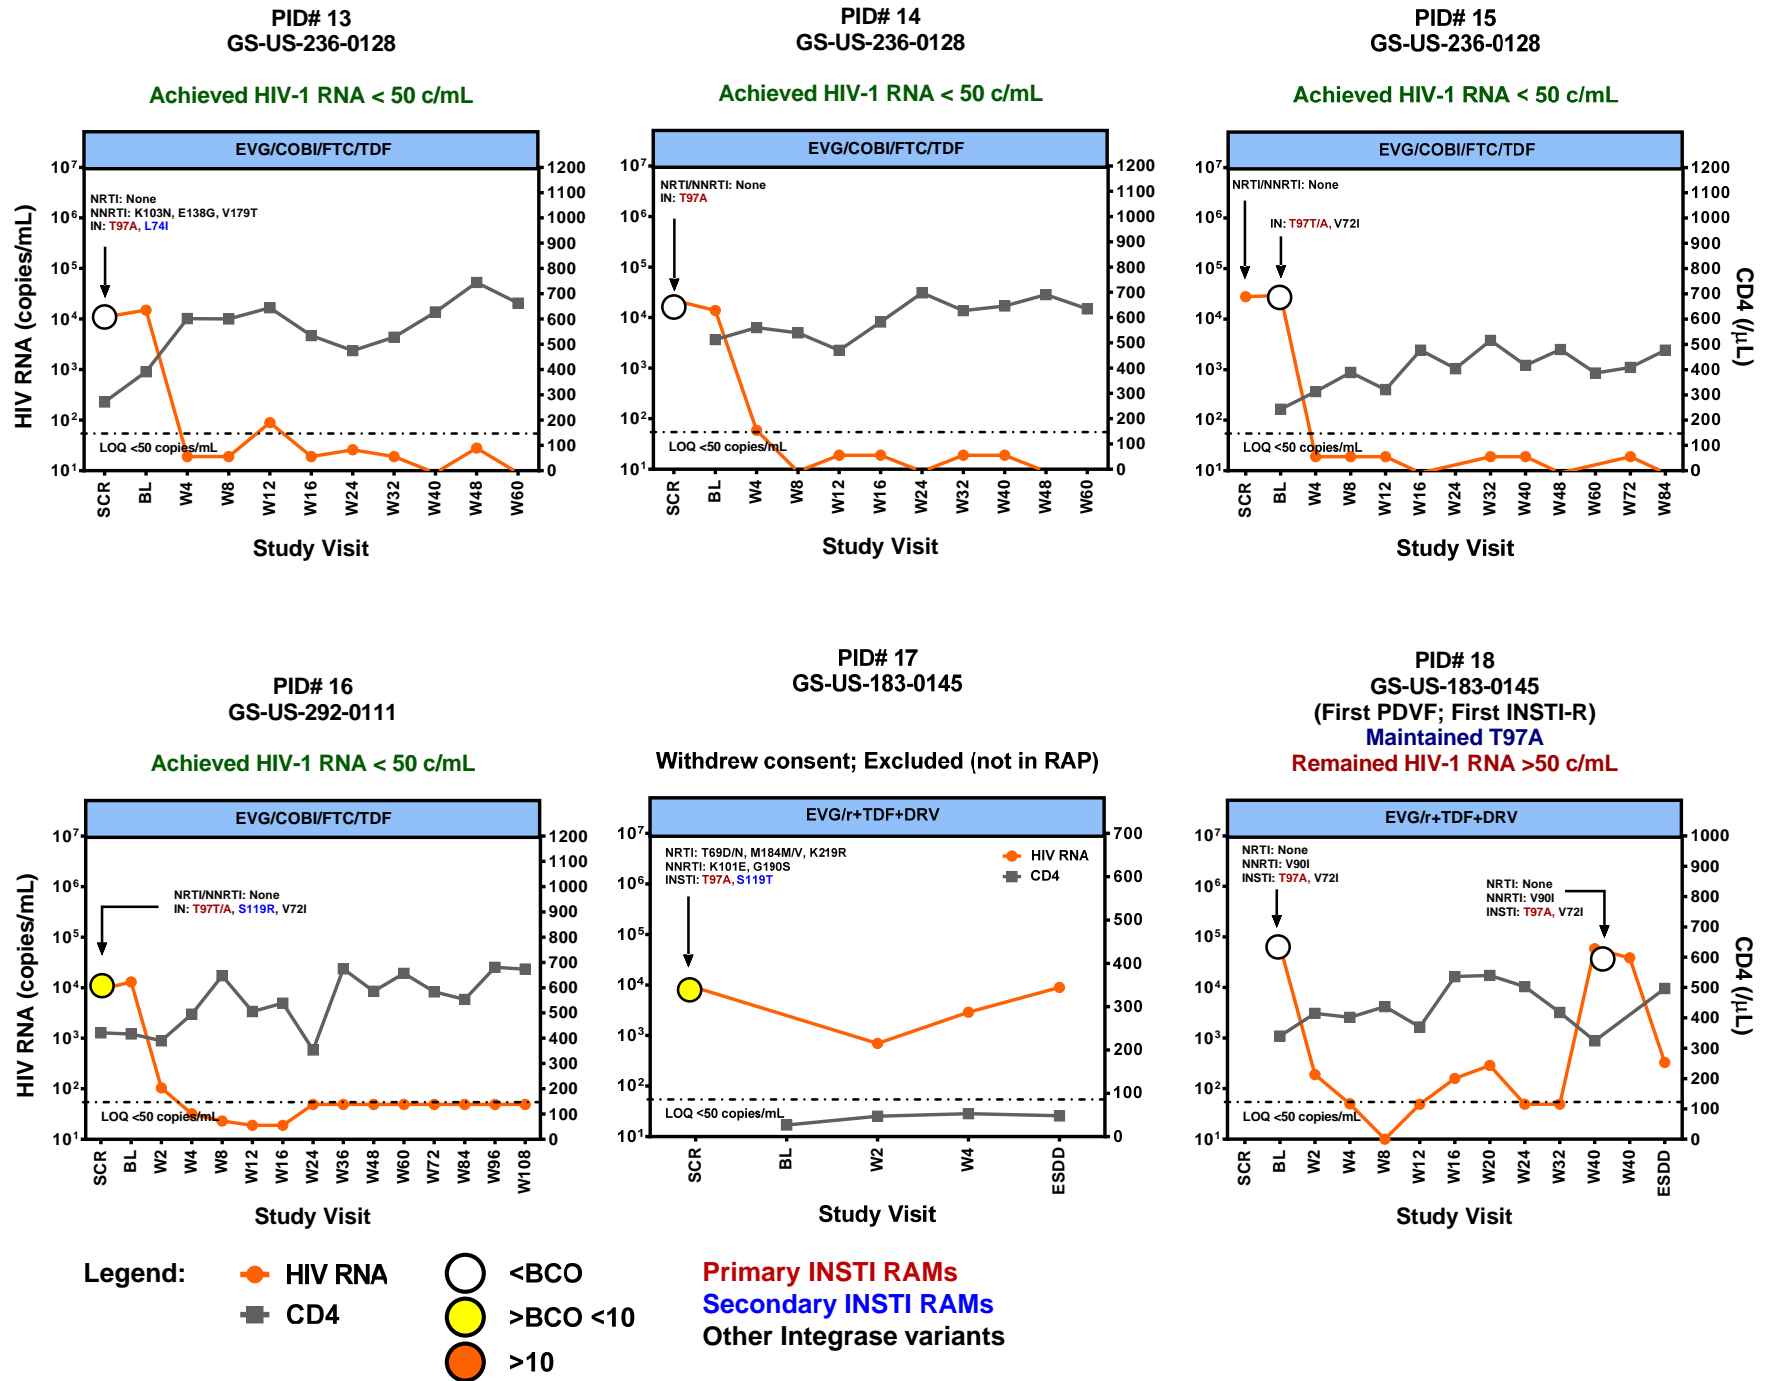

Supplement: pone.0172206.s004.pdf [file pone.0172206.s004.pdf]
