# Supplementary material for: Lack of impact of pre-existing T97A HIV-1 integrase mutation on integrase strand transfer inhibitor resistance and treatment outcome
Source: PubMed Central journal article supplement (PMC5315389; doi:10.1371/journal.pone.0172206), 2017-02-17

S3 Fig. On-Treatment Population of Patients with Emergent T97A Alone (n = 8): Longitudinal Plots

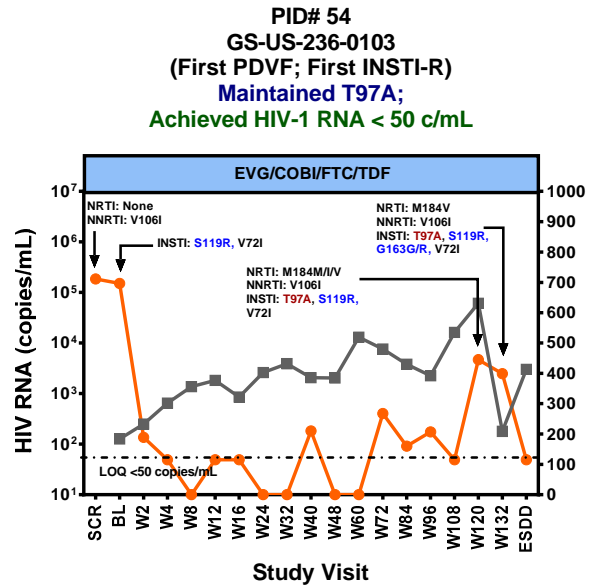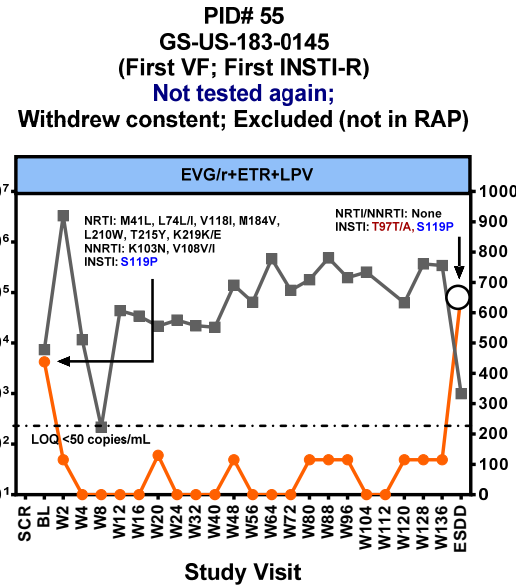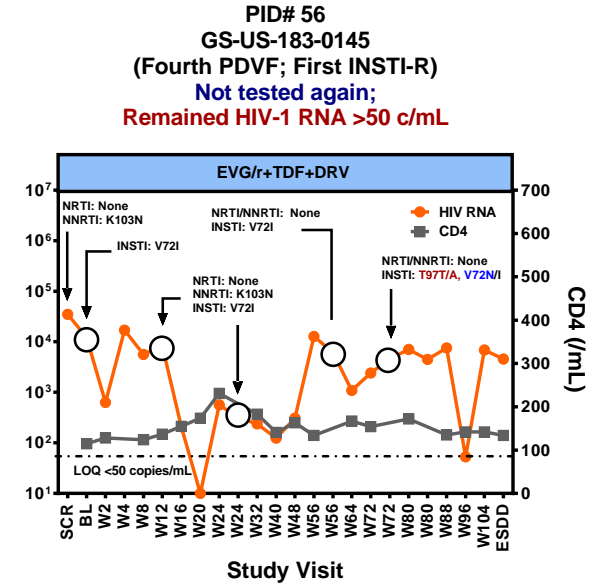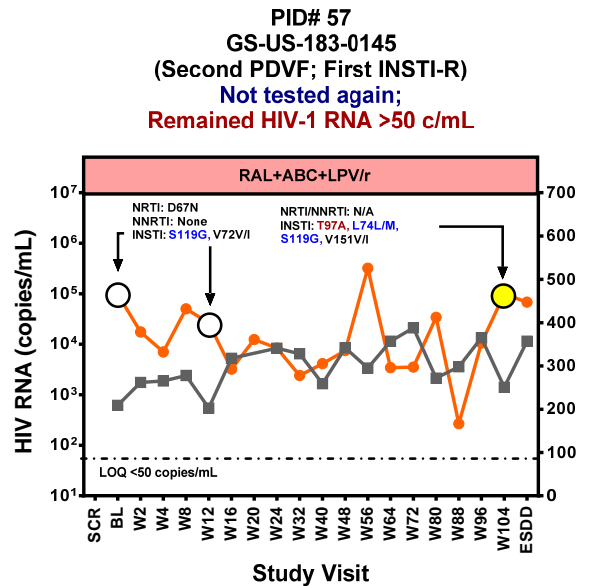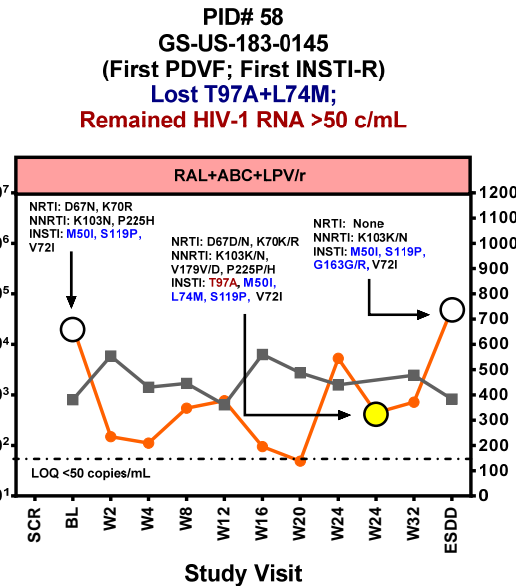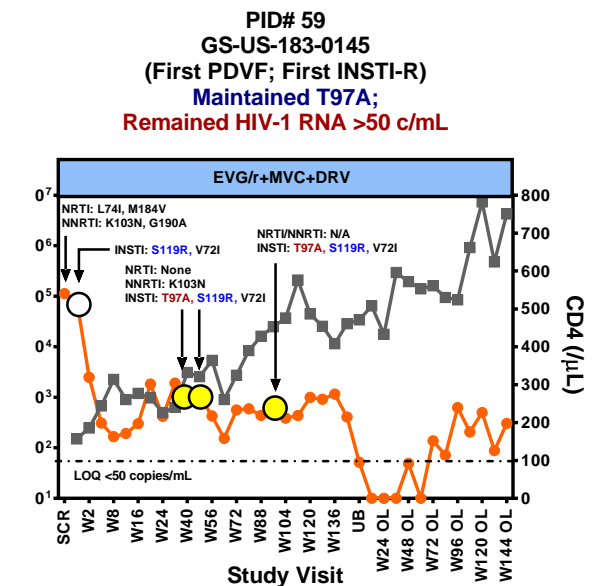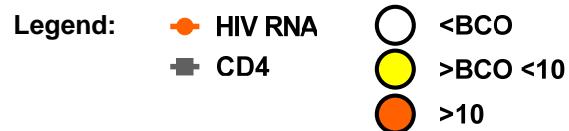

**Primary INSTI RAMs**  
**Secondary INSTI RAMs**  
**Other Integrase variants**

S3 Fig. On-Treatment Population of Patients with Emergent T97A Alone (n = 8): Longitudinal Plots (con't)

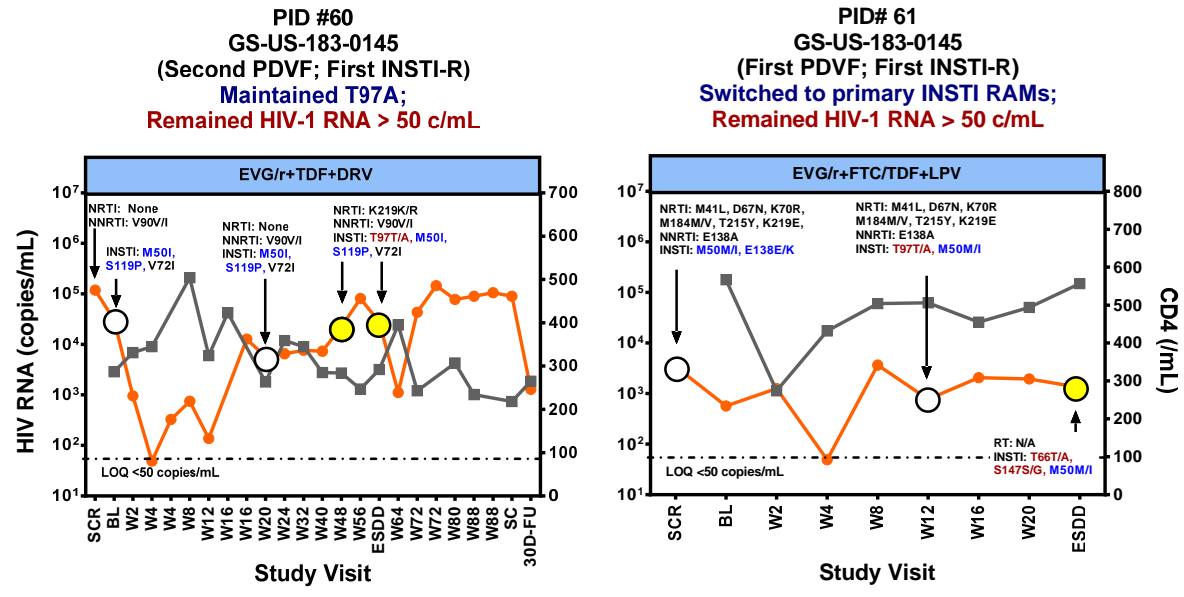

Supplement: pone.0172206.s006.pdf [file pone.0172206.s006.pdf]
